# Supplementary material for: Oxidative and reductive cyclization in stiff dithienylethenes
Source: publisher site journal article supplement (doi:10.3762/bjoc.14.259), 2018-11-09
Supplement: Additional file 1 [file 1860-5397-14-259-S1.pdf]

**Supporting Information**  
**for**  
**Oxidative and reductive cyclization in stiff dithienylethenes**

Michael Kleinwächter, Ellen Teichmann, Lutz Grubert, Martin Herder and Stefan Hecht\*

Address: Department of Chemistry & IRIS Adlershof, Humboldt-Universität zu Berlin, Brook-Taylor-Straße 2, 12489  
Berlin, Germany

Email: Stefan Hecht - sh@chemie.hu-berlin.de

\*Corresponding author

**Experimental part**

## General methods

1,2-Bis(5-chloro-2-methylthien-3-yl)cyclopent-1-ene [1], 1,2-bis(5-(4-bromophenyl)-2-methylthien-3-yl)cyclopent-1-ene [2] and 2-(9,9-dimethyl-9*H*-fluoren-2-yl)-4,4,5,5-tetramethyl-1,3,2-dioxaborolane [3] were prepared according to literature procedures. All solvents and other starting materials were commercial and used as received. Dry solvents were obtained employing an Innovative Technologies solvent purification system. THF was degassed and further dried by storing over activated molecular sieves (4 Å). All reactions involving light sensitive compounds were carried out in the dark under red light. The NMR spectra were recorded on a 500 MHz Bruker AVANCE II 500 spectrometer at 25 °C, if not mentioned otherwise, with the spectra referenced to the residual solvent signal ( $^1\text{H}$ :  $\delta$  ( $\text{CHCl}_3$ ) = 7.26 ppm,  $\delta$  ( $\text{THF-}d_7$ ) = 3.58 ppm and  $^{13}\text{C}$ :  $\delta$  ( $\text{CHCl}_3$ ) = 77.16 ppm,  $\delta$  ( $\text{THF-}d_7$ ) = 67.57 ppm). UPLC–MS was performed on a Waters UPLC Acquity equipped with a Waters LCT Premier XE Mass Detector for UPLC–HRMS, with Waters Alliance systems (consisting of a Waters Separations Module 2695, a Waters Diode Array Detector 996 and a Waters Mass Detector ZQ 2000). Preparative GPC was performed on a LC-9210NEXT preparative recycling GPC (Japan Analytical Industry). The ESI+/- values are obtained from UPLC chromatograms.

## Photochemical setup

The irradiation experiments were carried out in degassed spectroscopy grade solvents (HPLC-MS grade for MeCN). The analytical UV–vis spectroscopy was performed on a Cary 50 and Cary 60 UV–vis spectrophotometer equipped with a thermostated cell holder at 25 °C. The irradiation was performed in a quartz cuvette using either a 500 W mercury lamp coupled with a grating monochromator or a 1000 W high pressure Xenon lamp with optical band pass or cut-off filters.

## Electrochemical setup

Cyclic voltammetry was performed using a PG310 USB (HEKA Elektronik) potentiostat interfaced to a PC with PotMaster v2x43 (HEKA Elektronik) software for data evaluation. A three-electrode configuration was used, contained in a non-divided cell consisting of a platinum disc ( $d = 1$  mm) as working electrode, a platinum plate as counter-electrode, and a saturated calomel electrode (SCE) with an agar-agar-plug in a Luggin capillary with a diaphragm as reference electrode. Measurements were carried out in  $1 \cdot 10^{-3}$  M solutions in acetonitrile (HPLC-grade, dried over calcium hydride and distilled) containing 0.1 M  $\text{Bu}_4\text{NPF}_6$  using a scan rate of  $dE/dt = 1 \text{ V s}^{-1}$ , in DCM (HPLC-grade, dried over calcium hydride and distilled) containing 0.2 M  $\text{Bu}_4\text{NPF}_6$  and a scan rate of  $dE/dt = 0.1 \text{ V s}^{-1}$  or in DMF (Sigma-Aldrich, anhydrous 99.8%) containing 0.1 M  $\text{Bu}_4\text{NPF}_6$  and a scan rate of  $dE/dt = 1 \text{ V s}^{-1}$ . The data is given in reference to the ferrocene redox couple ( $\text{Fc}/\text{Fc}^+$ ), which was used as external standard. Cyclic voltammograms of ring-closed isomers of diarylethenes were obtained by irradiation of the electrochemical cell using a standard laboratory UV-lamp equipped with a 313 nm UV-tube (Vilber Lourmat, 6 W).

Spectro-electrochemistry was performed in a SEC-C Thin Layer Quartz Glass Spectro-electrochemical cell, 0.5 or 1.0 mm optical path length, with platinum mesh electrode as a working electrode, counter electrode: platinum wire, reference electrode: non aqueous reference electrode  $\text{Ag}/\text{Ag}^+$  (0.01 M  $\text{AgNO}_3$  in 0.1 M  $\text{Bu}_4\text{NPF}_6$  acetonitrile), ALS Co., Ltd (Tokyo, Japan) spectrometer: AvaSpec-2048x14 with AvaLight-DH-S-BAL, and AvaSoft 7.7.2, Avantes

(Apeldoorn, Netherlands) Potentiostat: PGSTAT 128N, Deutsche Metrohm GmbH & Co. KG (Filderstadt, Germany) and software: NOVA 1.10. Scan rate for all solvents  $dE/dt = 10 \text{ mV s}^{-1}$ .

Preparative electrolysis was performed in a double H cell equipped with a platinum net.

## Synthesis

### 1-(5-(4-*N,N*-Dimethylaminophenyl)-2-methylthien-3-yl)-2-(5-chloro-2-methylthien-3-yl)cyclopent-1-ene (**Me<sub>2</sub>NPh-DTE-Cl**)

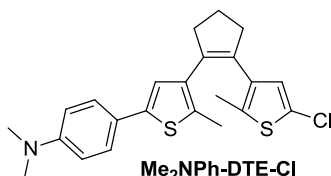

In analogy to a literature procedure [1], 1,2-bis(5-chloro-2-methylthien-3-yl)cyclopent-1-ene [1] (0.659 g, 2.00 mmol, 1.0 equiv) was dissolved in 20 mL of anhydrous THF under argon atmosphere. The resulting solution was cooled to  $-78^{\circ}\text{C}$ , *n*-butyllithium (2.3 M in cyclohexane, 1.30 mL, 3.00 mmol, 1.5 equiv) was added dropwise and the solution was stirred at that temperature for 30 min. Then tri(isobutyl) borate (0.752 g, 0.923 mL, 4.00 mmol, 2.0 equiv) was added and the solution was stirred for 1 h while gently warming to room temperature. In the meantime, 4-bromo-*N,N*-dimethylaniline (0.480 g, 2.40 mmol, 1.2 equiv) was dissolved in 20 mL of degassed THF and  $\text{Pd}(\text{PPh}_3)_4$  (0.231 g, 0.20 mmol, 0.1 equiv) was added at once resulting in a bright yellow solution which was stirred for 15 min. An aqueous solution of  $\text{Na}_2\text{CO}_3$  (2 M, 4.00 mL, 8.00 mmol, 4.0 equiv), 5 droplets of ethylene glycol and the previously prepared solution of the borylated species were added and the resulting two-phase system was heated to  $65^{\circ}\text{C}$  for 14 h.

After cooling to room temperature, the reaction mixture was diluted with 100 mL of water and extracted with  $3 \times 50 \text{ mL}$  of ethyl acetate. The combined organic layers were washed with 100 mL of water and saturated NaCl solution, dried over  $\text{MgSO}_4$  and concentrated under reduced pressure. Purification by column chromatography (ethyl acetate / cyclohexane) afforded the title compound (0.678 g, 1.64 mmol, 82% yield) as a brownish solid.

**<sup>1</sup>H-NMR** (500 MHz,  $\text{CDCl}_3$ ):  $\delta$  [ppm] = 7.38 (d,  $^3J_{\text{H,H}} = 8.9 \text{ Hz}$ , 2H,  $\text{CH}_{\text{ar}}$ ), 6.82 (s, 1H,  $\text{CH}_{\text{tph}}$ ), 6.70 (d,  $^3J_{\text{H,H}} = 8.9 \text{ Hz}$ , 2H,  $\text{CH}_{\text{ar}}$ ), 6.63 (s, 1H,  $\text{CH}_{\text{tph}}$ ), 2.96 (s, 6H,  $\text{NCH}_3$ ), 2.83 - 2.71 (m, 4H,  $\text{CH}_2$ ), 2.00 - 1.92 (m, 2H,  $\text{CH}_2$ ), 1.97 (s, 3H,  $\text{CH}_3$ ), 1.88 (s, 3H,  $\text{CH}_3$ ).

**<sup>13</sup>C-NMR** (126 MHz,  $\text{CDCl}_3$ ):  $\delta$  [ppm] = 149.9, 140.7, 136.2, 135.8, 135.4, 133.4, 132.5, 131.8, 127.0, 125.0, 123.2, 121.7, 114.2, 112.8, 40.7, 38.6, 38.5, 23.1, 14.5, 14.3.

**HR-MS** ( $\text{ESI}^+$ )  $m/z = 414.112$  (calcd. 414.111 for  $[\text{C}_{23}\text{H}_{24}\text{ClNS}_2+\text{H}]^+$ ).

**1-(5-(4-*N,N*-Dimethylaminophenyl)-2-methylthien-3-yl)-2-(5-(4-cyanophenyl)-2-methylthien-3-yl)cyclopent-1-ene (Me<sub>2</sub>NPh-DTE-PhCN)**

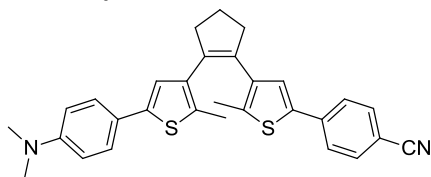

**Me<sub>2</sub>NPh-DTE-PhCN**

The title compound was synthesized following the procedure described for preparation of **Me<sub>2</sub>NPh-DTE-Cl** using compound **Me<sub>2</sub>NPh-DTE-Cl** (166 mg, 0.400 mmol, 1.0 equiv) in 10 mL of anhydrous THF, *n*-butyllithium (2.3 M in cyclohexane, 0.435 mL, 1.00 mmol, 2.5 equiv), tri(isobutyl) borate (0.188 g, 0.231 mL, 1.00 mmol, 2.5 equiv), 4-bromobenzonitrile (87.0 mg, 0.480 mmol, 1.2 equiv) in 10 mL of THF, Pd(PPh<sub>3</sub>)<sub>4</sub> (46.0 mg, 0.040 mmol, 0.1 equiv) and an aqueous solution of Na<sub>2</sub>CO<sub>3</sub> (2 M, 0.800 mL, 1.60 mmol, 4.0 equiv). The reaction was performed at 65 °C for 16 h. Purification by column chromatography (ethyl acetate/cyclohexane) followed by GPC afforded the title compound (97.0 mg, 0.202 mmol, 50% yield) as greenish oil which was lyophilized from benzene to give a greenish powder.

**<sup>1</sup>H-NMR** (500 MHz, CDCl<sub>3</sub>, Figure S1): δ [ppm] = 7.59 (d, <sup>3</sup>*J*<sub>H,H</sub> = 8.7 Hz, 2H, CH<sub>ar</sub>), 7.54 (d, <sup>3</sup>*J*<sub>H,H</sub> = 8.7 Hz, 2H, CH<sub>ar</sub>), 7.38 (d, <sup>3</sup>*J*<sub>H,H</sub> = 8.9 Hz, 2H, CH<sub>ar</sub>), 7.13 (s, 1H, CH<sub>tph</sub>), 6.86 (s, 1H, CH<sub>tph</sub>), 6.70 (d, <sup>3</sup>*J*<sub>H,H</sub> = 8.9 Hz, 2H, CH<sub>ar</sub>), 2.96 (s, 6H, NCH<sub>3</sub>), 2.87 - 2.80 (m, 4H, CH<sub>2</sub>), 2.12 - 2.05 (m, 2H, CH<sub>2</sub>), 2.06 (s, 3H, CH<sub>3</sub>), 1.96 (s, 3H, CH<sub>3</sub>).

**<sup>13</sup>C-NMR** (126 MHz, CDCl<sub>3</sub>, Figure S2): δ [ppm] = 149.9, 140.8, 139.0, 137.6, 137.4, 137.3, 136.3, 136.0, 133.7, 132.8, 132.4, 126.5, 126.4, 125.5, 123.2, 121.7, 119.2, 112.7, 109.8, 40.7, 38.6, 38.5, 23.2, 14.8, 14.5.

**HR-MS** (ESI<sup>+</sup>) *m/z* = 481.178 (calcd. 481.177 for [C<sub>30</sub>H<sub>28</sub>N<sub>2</sub>S<sub>2</sub>+H]<sup>+</sup>).

**1,2-Bis(5-(4-cyanophenyl)-2-methylthien-3-yl)cyclopent-1-ene (DTE-PhCN)**

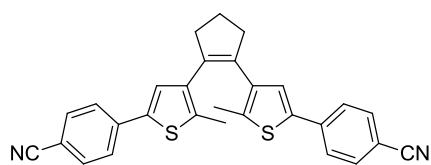

**DTE-PhCN**

The title compound was synthesized following the procedure described for **Me<sub>2</sub>NPh-DTE-Cl** using 1,2-bis(5-chloro-2-methylthien-3-yl)cyclopent-1-ene [1] (0.329 g, 1.00 mmol, 1.0 equiv) in 10 mL of anhydrous THF, *n*-butyllithium (2.3 M in cyclohexane, 1.74 mL, 4.00 mmol, 4.0 equiv), tri(isobutyl) borate (0.752 g, 0.923 mL, 4.00 mmol, 4.0 equiv), 4-bromobenzonitrile (0.546 g, 3.00 mmol, 3.0 equiv) in 10 mL of THF, Pd(PPh<sub>3</sub>)<sub>4</sub> (0.116 g, 0.10 mmol, 0.1 equiv) and an aqueous solution of Na<sub>2</sub>CO<sub>3</sub> (2 M, 2.00 mL, 4.00 mmol, 4.0 equiv). The reaction was performed at 65°C for 17 h. Purification by column chromatography (ethyl acetate/cyclohexane), recrystallization from chloroform/ethanol and GPC afforded the title compound (0.181 g, 0.392 mmol, 39% yield) as a white solid.

**<sup>1</sup>H-NMR** (500 MHz, THF-d<sub>8</sub>, Figure S3): δ [ppm] = 7.70 - 7.65 (m, 8H, CH<sub>ar</sub>), 7.36 (s, 2H, CH<sub>tp</sub>), 2.93 - 2.85 (m, 4H, CH<sub>2</sub>), 2.14 - 2.06 (m, 2H, CH<sub>2</sub>), 1.99 (s, 6H, CH<sub>3</sub>).

**<sup>13</sup>C-NMR** (126 MHz, THF-d<sub>8</sub>, Figure S4): δ [ppm] = 139.5, 139.0, 138.5, 137.8, 136.0, 133.7, 127.4, 126.4, 119.2, 111.6, 39.4, 24.0, 14.8.

**HR-MS** (ESI<sup>+</sup>) *m/z* = 463.124 (calcd. 463.130 for [C<sub>29</sub>H<sub>22</sub>N<sub>2</sub>S<sub>2</sub>+H]<sup>+</sup>).

**1,2-Bis(5-(4-(9,9-dimethyl-9H-fluoren-2-yl)phenyl)-2-methylthien-3-yl)cyclopent-1-ene  
(DTE-PhFluorene)**

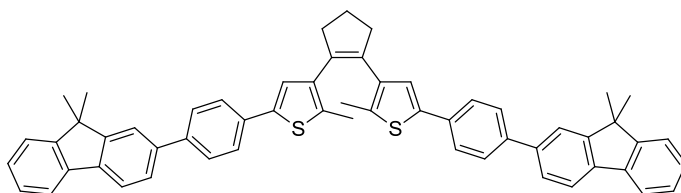

DTE-PhFluorene

1,2-Bis(5-(4-bromophenyl)-2-methylthien-3-yl)cyclopent-1-ene [2] (915 mg, 1.61 mmol, 1.0 equiv) and 2-(9,9-dimethyl-9H-fluoren-2-yl)-4,4,5,5-tetramethyl-1,3,2-dioxaborolane [3] (1.079 g, 3.37 mmol, 2.1 equiv) were dissolved in 30 mL of toluene and the mixture was degassed by bubbling with argon for 10 min. A degassed solution of Na<sub>2</sub>CO<sub>3</sub> (2 M, 7.5 mL) as well as PdCl<sub>2</sub>(PPh<sub>3</sub>)<sub>2</sub> (113 mg, 0.16 mmol, 0.1 equiv) were added and the mixture was stirred at 110 °C for 15 h. After cooling to room temperature, the mixture was diluted with ethyl acetate and was washed with brine (3×). The organic phase was dried over MgSO<sub>4</sub> and evaporated. Purification by column chromatography (petrol ether/methylene chloride 4:1) afforded the title compound (270 mg, 0.34 mmol, 21%) as a white solid.

**<sup>1</sup>H-NMR** (300 MHz, CDCl<sub>3</sub>, Figure S5): δ (ppm) = 7.81 – 7.72 (m, 4 H), 7.69 – 7.56 (m, 12 H), 7.49 – 7.43 (m, 2 H), 7.39 – 7.30 (m, 4 H), 7.13 (s, 2 H), 2.90 (t, <sup>3</sup>J<sub>H,H</sub> = 7.4 Hz, 4 H), 2.13 (pent, <sup>3</sup>J<sub>H,H</sub> = 7.4 Hz, 2 H), 2.06 (s, 6 H), 1.54 (s, 12 H).

**<sup>13</sup>C-NMR** (75.5 MHz, CDCl<sub>3</sub>, Figure S6): δ (ppm) = 154.4, 154.0, 140.1, 139.8, 139.4, 138.9, 138.6, 136.9, 134.82, 134.75, 133.5, 127.5 (CH), 127.4 (CH), 127.1 (CH), 126.0 (CH), 125.7 (CH), 124.2 (CH), 122.7 (CH), 121.1 (CH), 120.4 (CH), 120.1 (CH), 47.0, 38.6 (CH<sub>2</sub>), 27.3 (CH<sub>3</sub>), 23.2 (CH<sub>2</sub>), 14.6 (CH<sub>3</sub>).

**HRMS** (ESI<sup>+</sup>): 796.319 (calcd. 796.319 for [C<sub>57</sub>H<sub>48</sub>S<sub>2</sub>]<sup>+</sup>).

## Additional graphs and data

### NMR Spectra

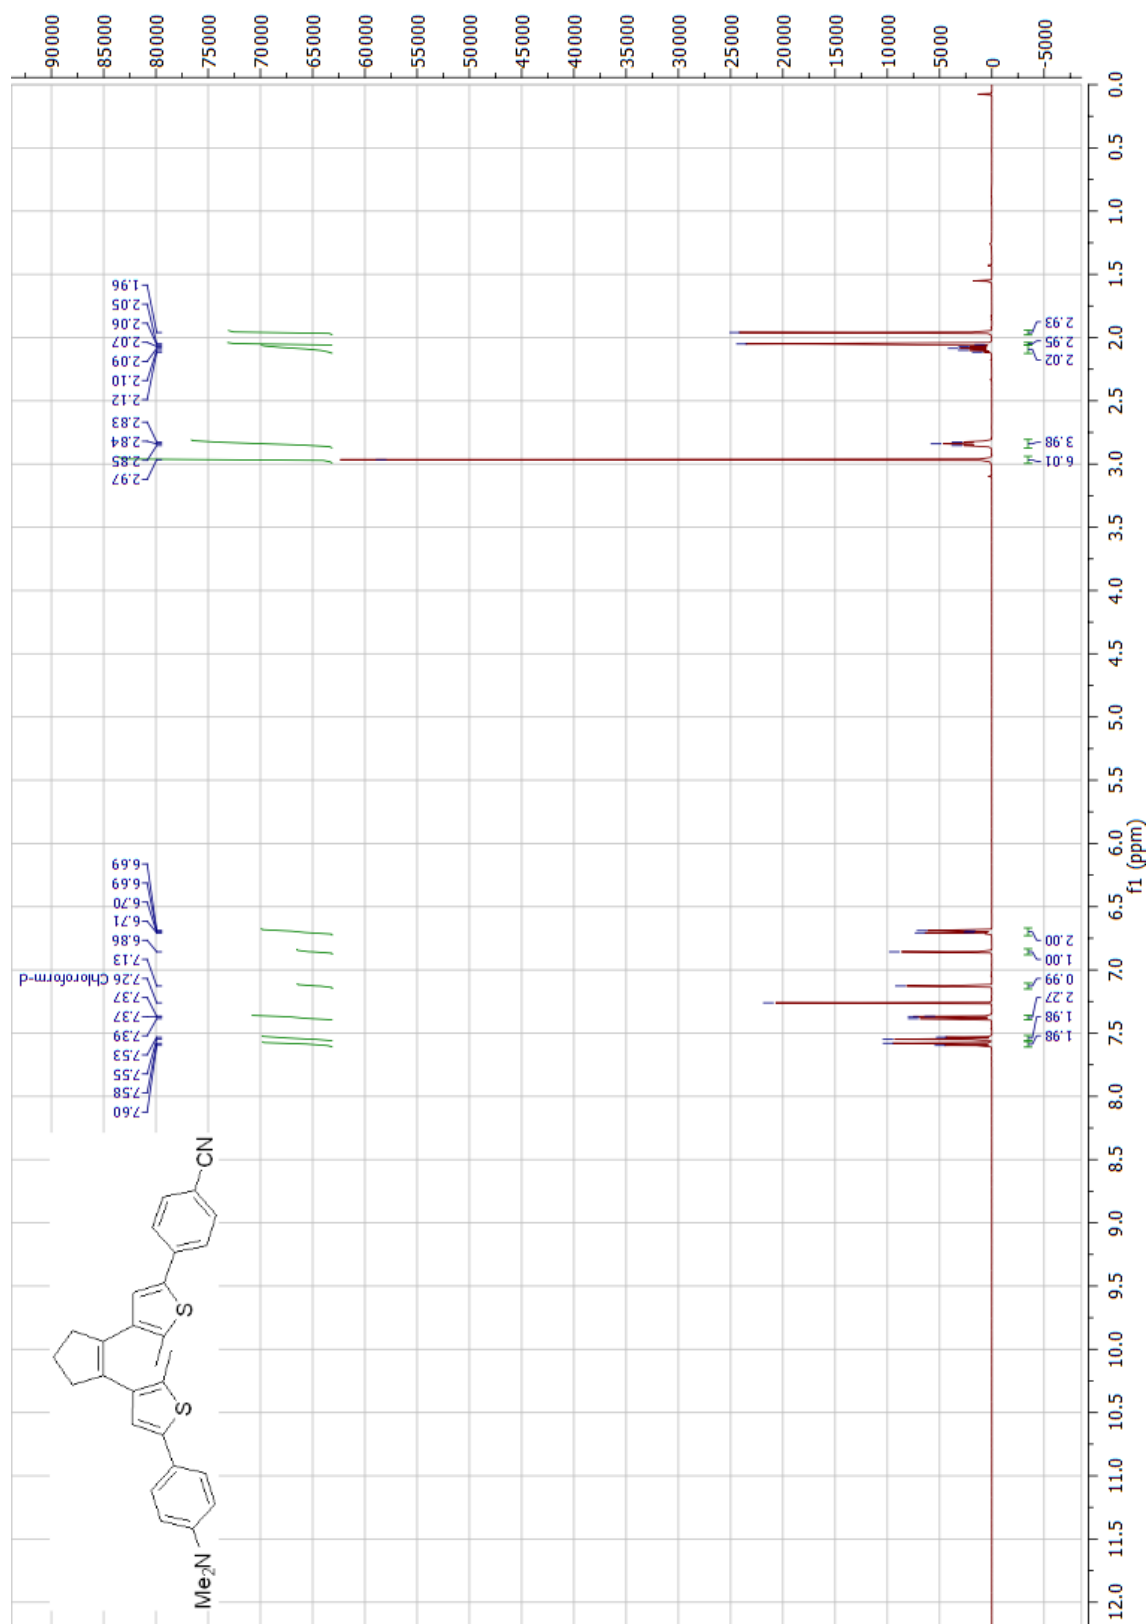

**Figure S1:**  $^1\text{H}$  NMR of  $\text{Me}_2\text{NPh-DTE-PhCN}$  (500 MHz,  $\text{CDCl}_3$ ).

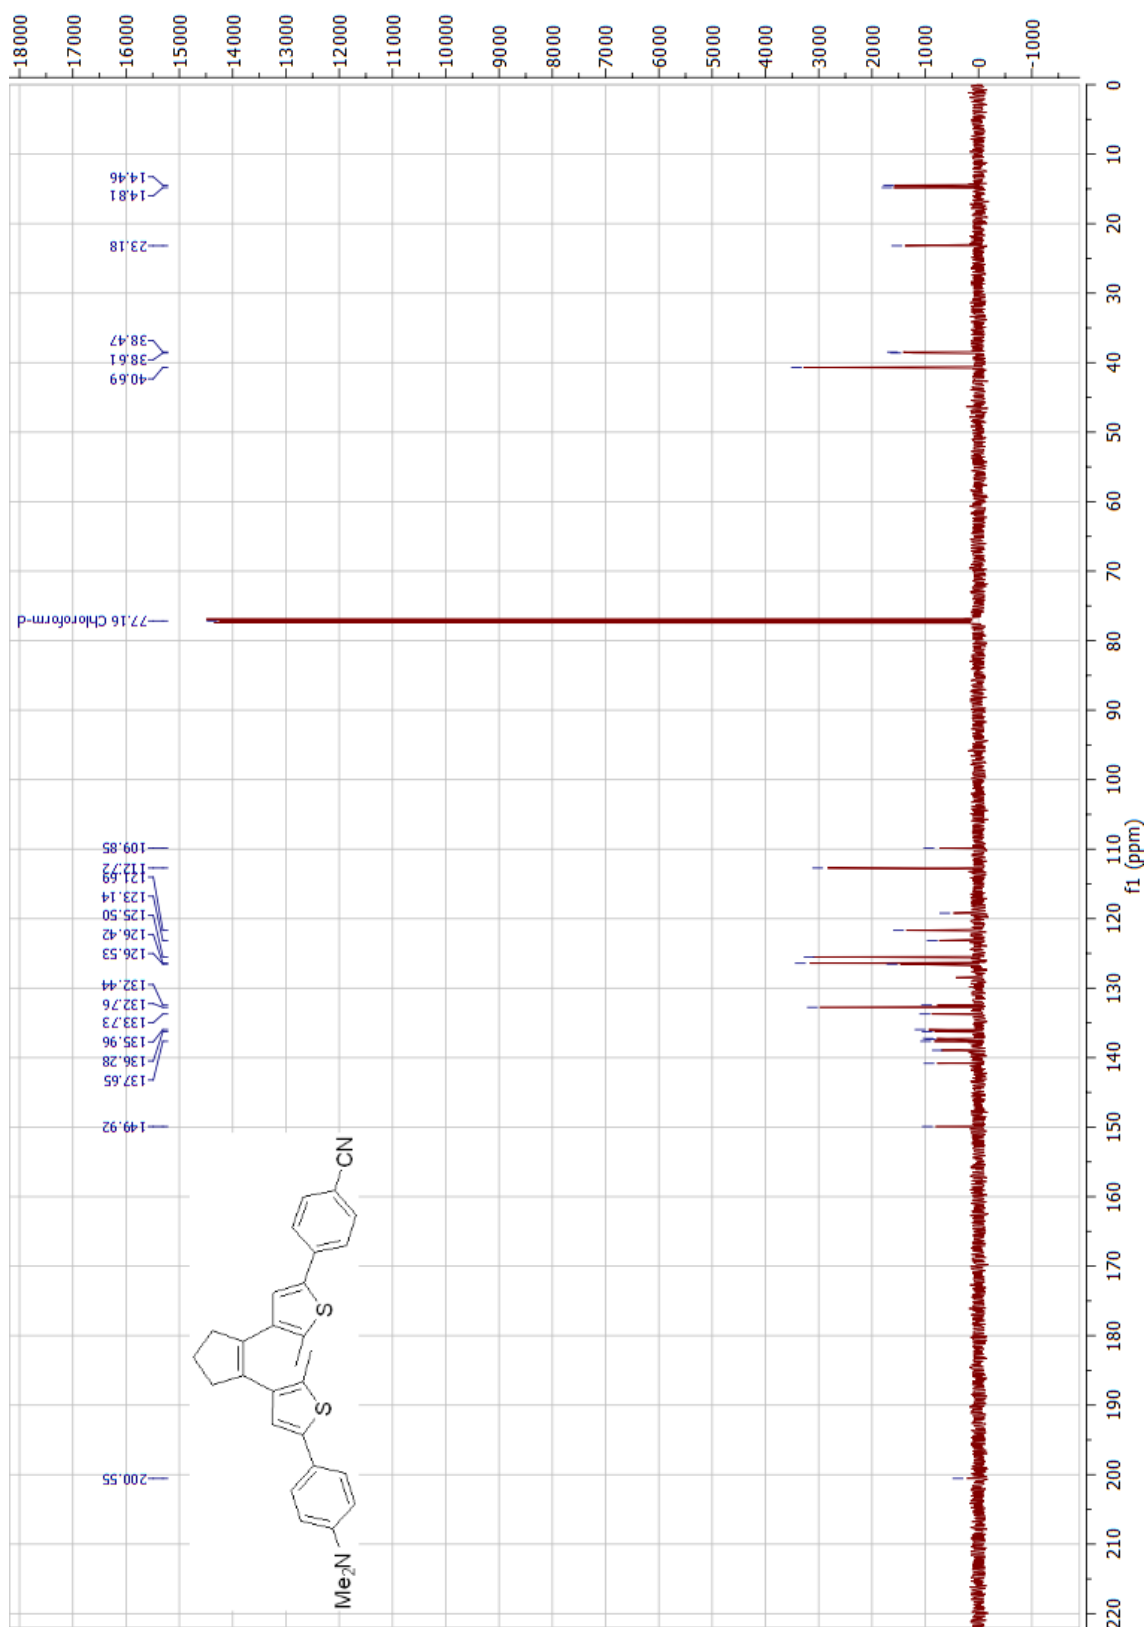

**Figure S2:**  $^{13}\text{C}$  NMR of **Me<sub>2</sub>NPh-DTE-PhCN** (126 MHz,  $\text{CDCl}_3$ ).

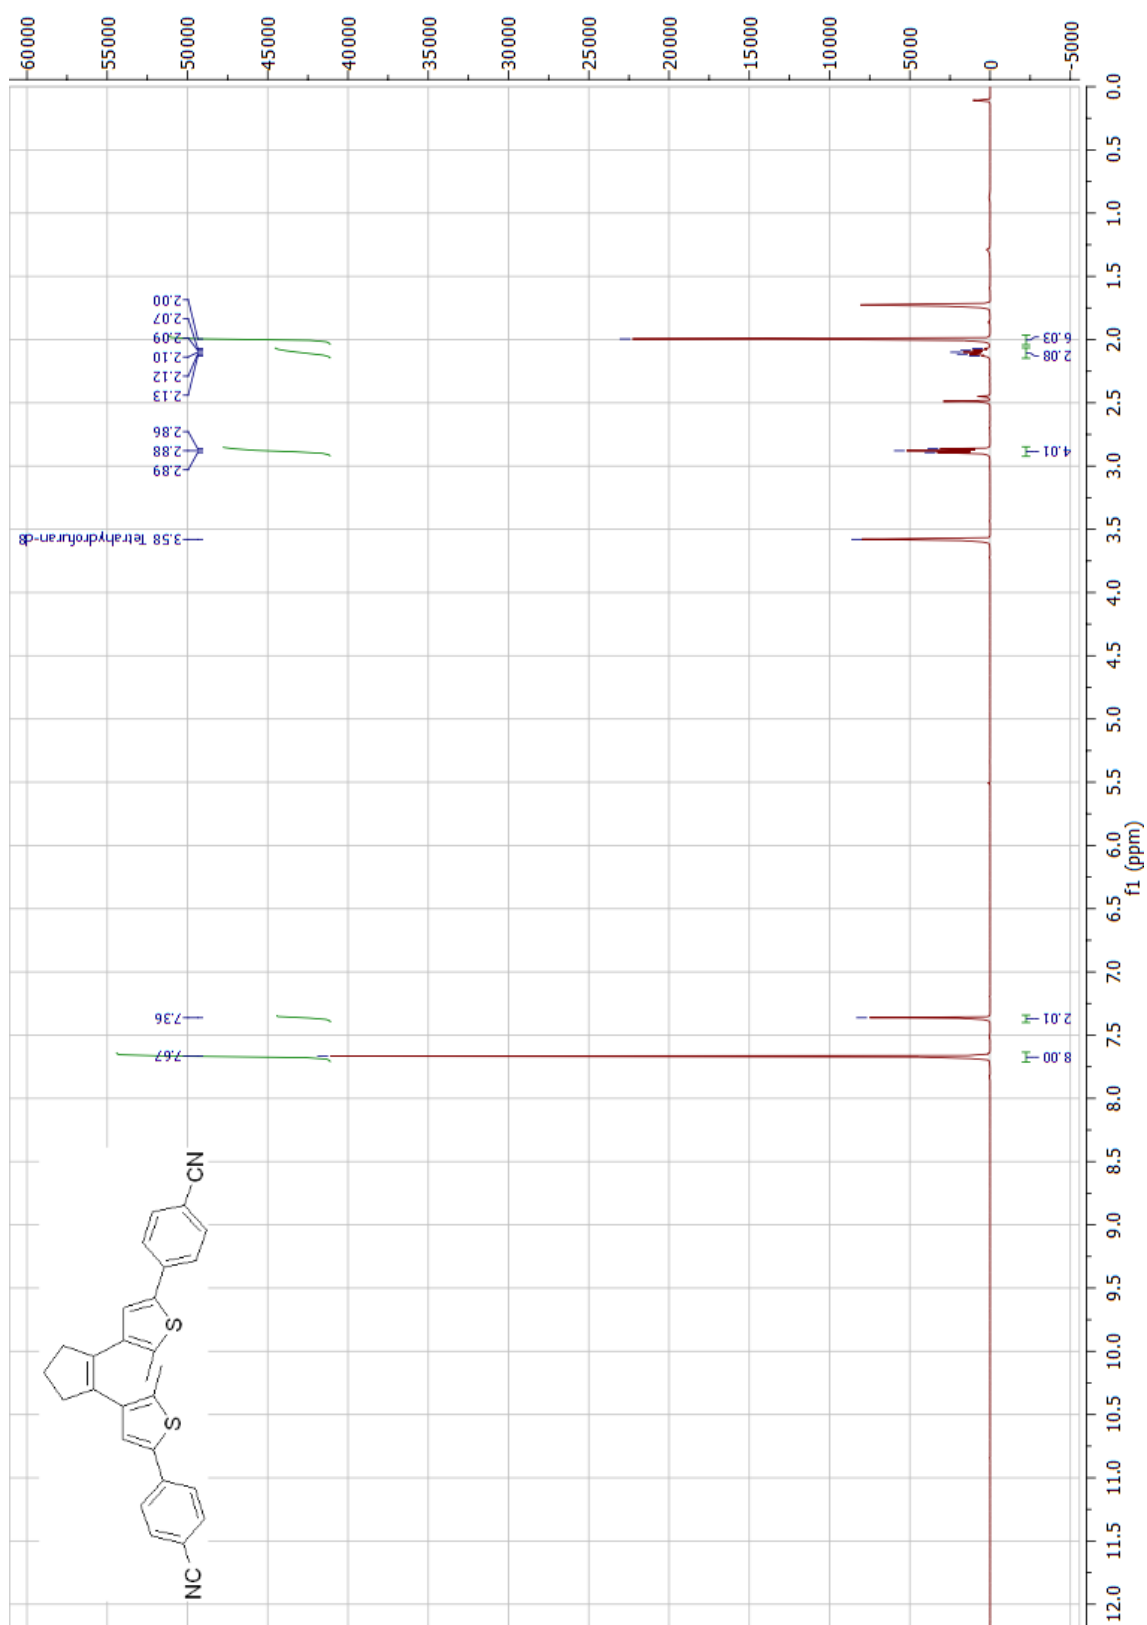

**Figure S3:**  $^1\text{H}$  NMR of DTE-PhCN (500 MHz,  $\text{THF-d}_8$ ).



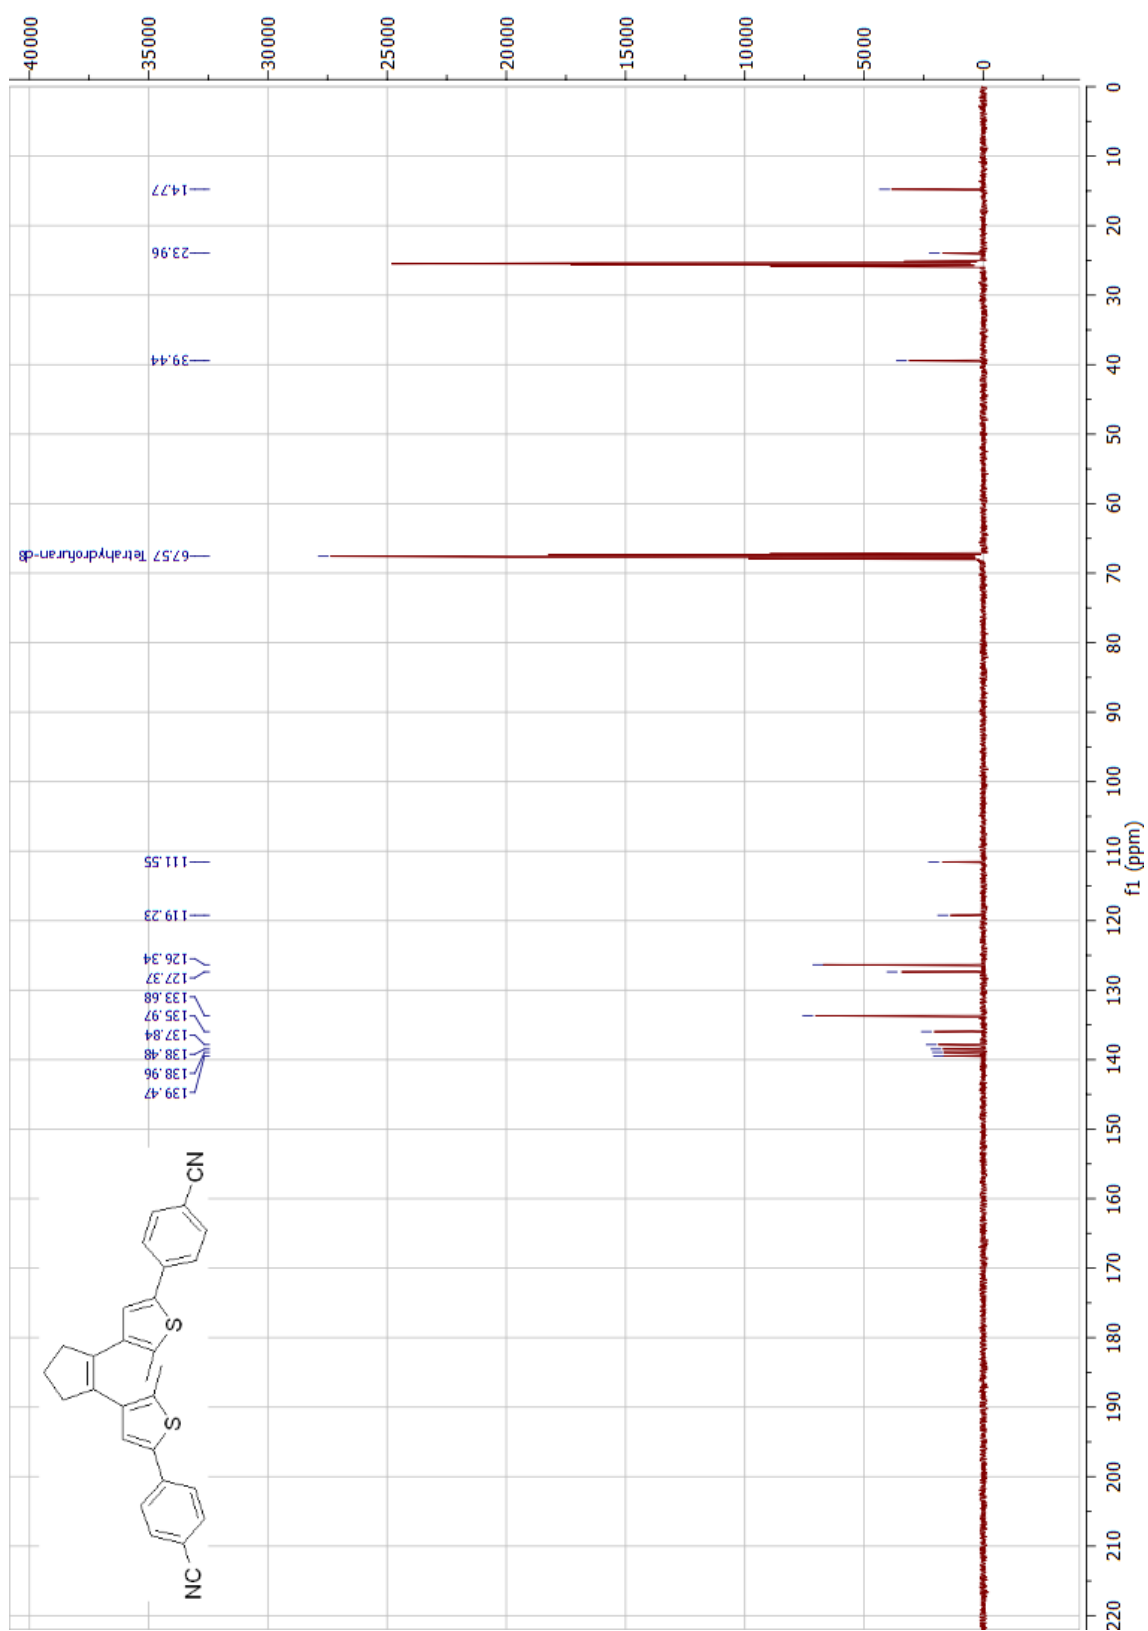

**Figure S4:** <sup>13</sup>C NMR of DTE-PhCN (126 MHz, THF-*d*<sub>8</sub>).

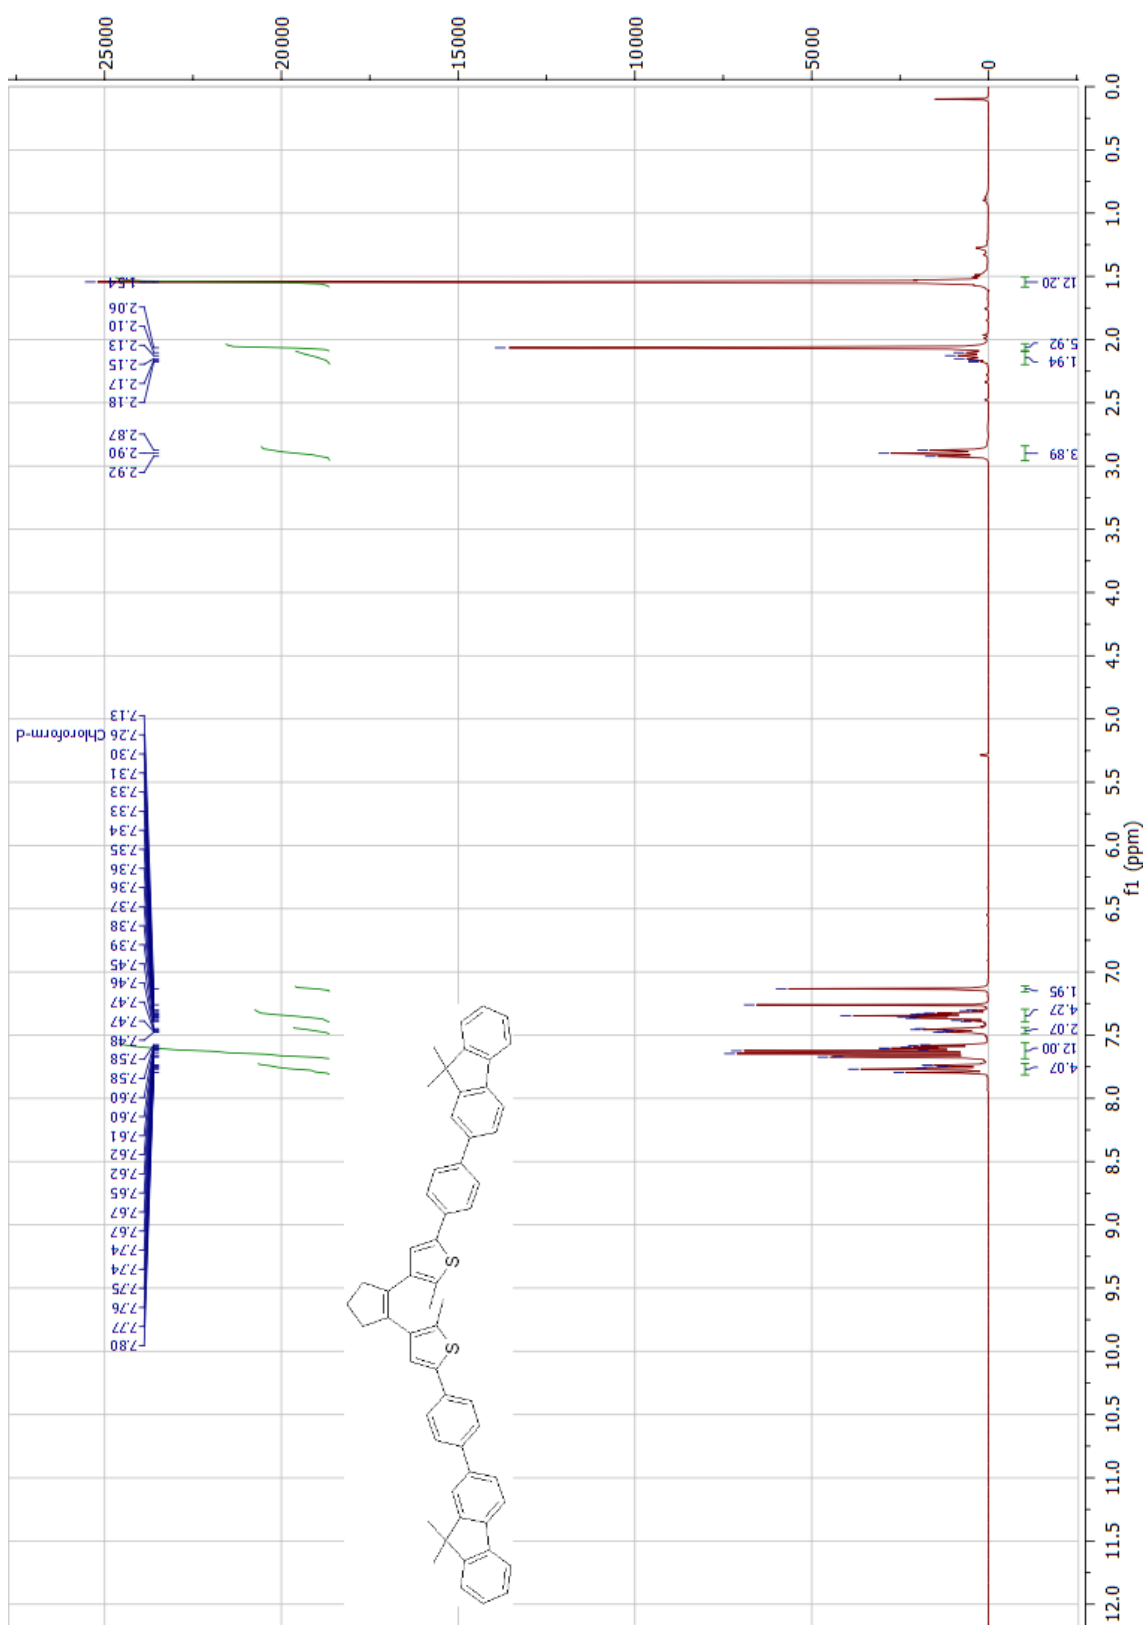

**Figure S5:** <sup>1</sup>H NMR of DTE-PhFluorene (300 MHz, CDCl<sub>3</sub>).

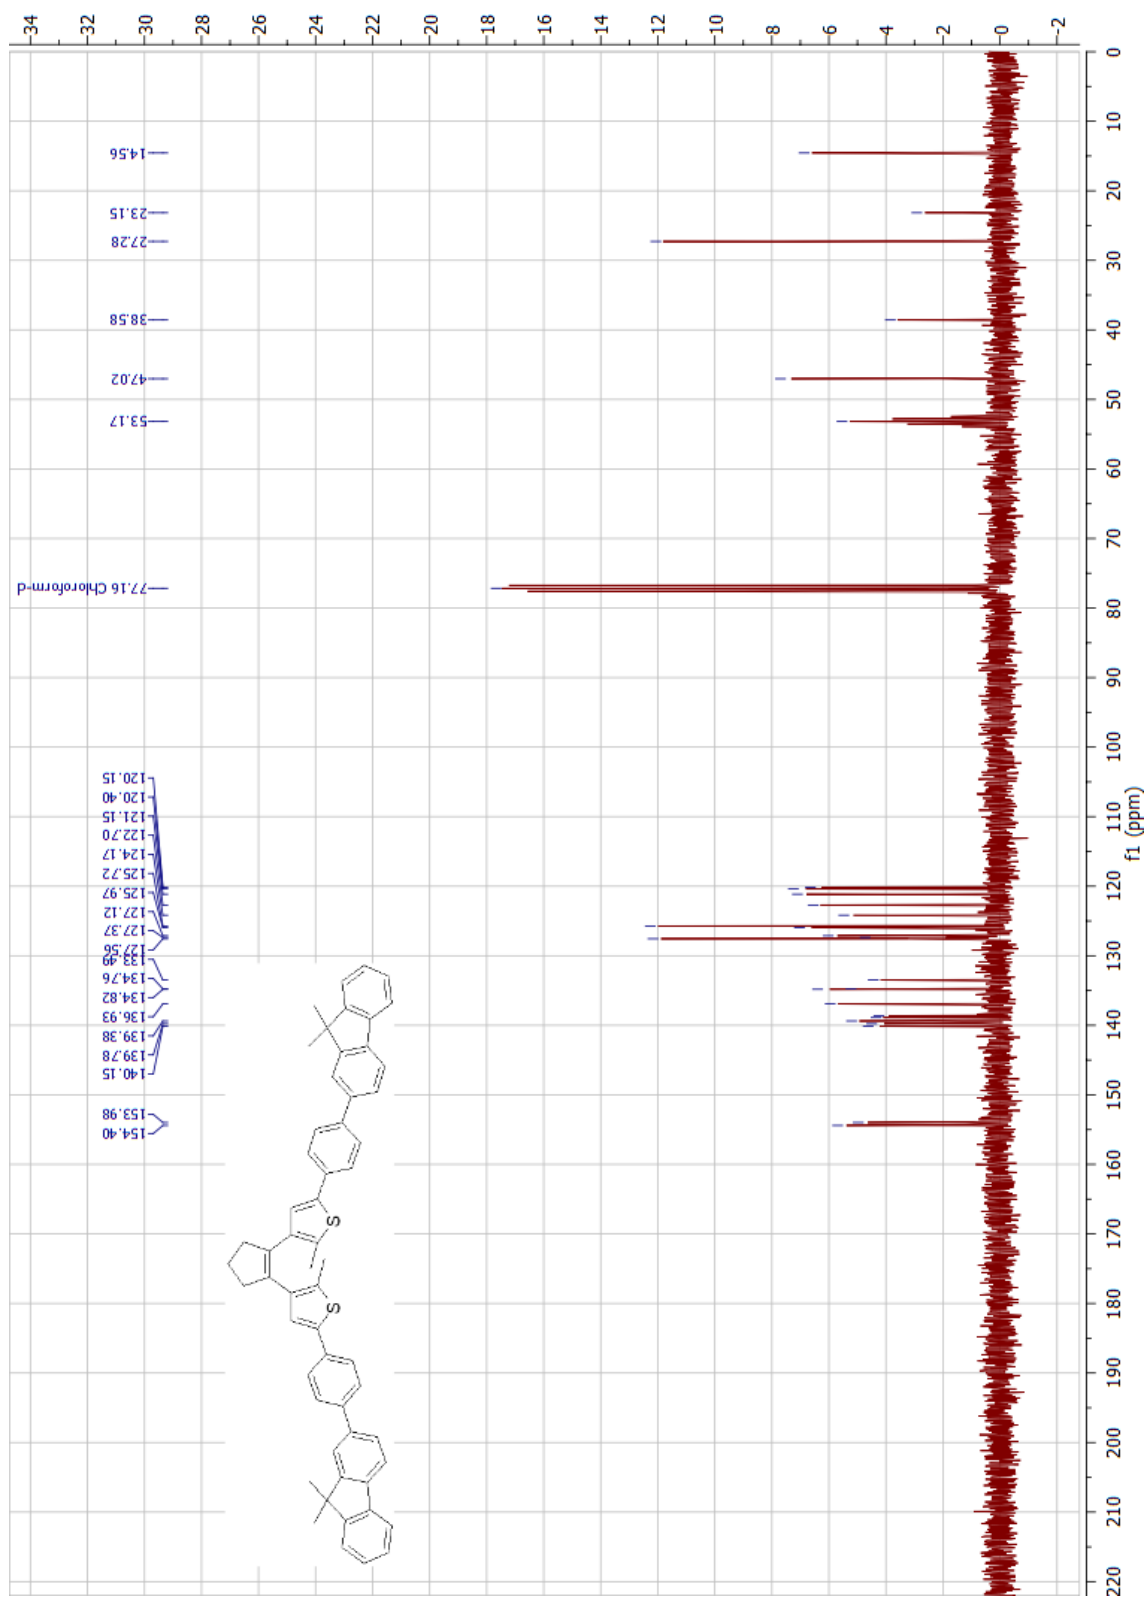

### UV-vis measurements

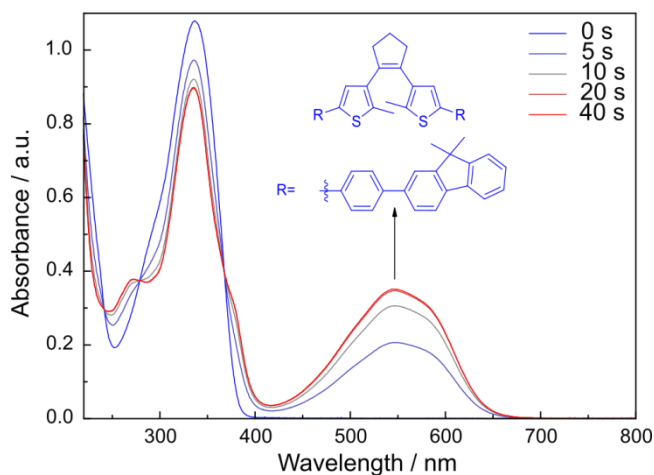

**Figure S7:** UV-vis spectra of **O-DTE-PhFluorene** in MeCN ( $c = 1.40 \cdot 10^{-5}$  M, 25 °C), irradiated with UV light (1000 W Xe(Hg) lamp, 350 nm interference filter) until reaching the photostationary state (PSS).

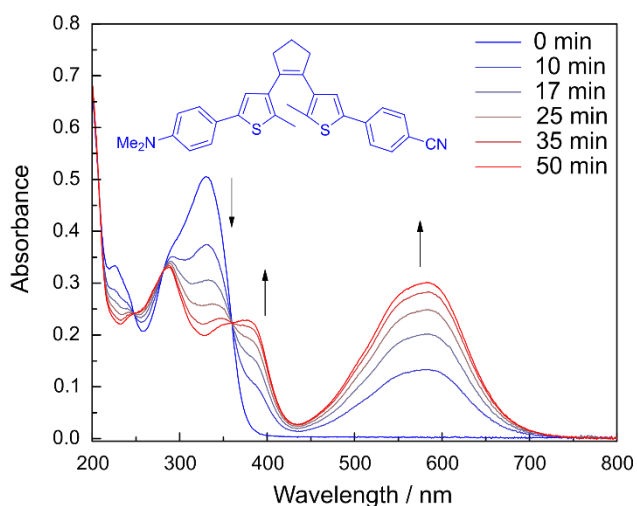

**Figure S8:** UV-vis spectra of **O-Me<sub>2</sub>NPh-DTE-PhCN** in MeCN ( $c = 1.24 \cdot 10^{-5}$  M, 25 °C) under irradiation with 313 nm light (500 W mercury lamp, monochromator) until reaching the PSS.

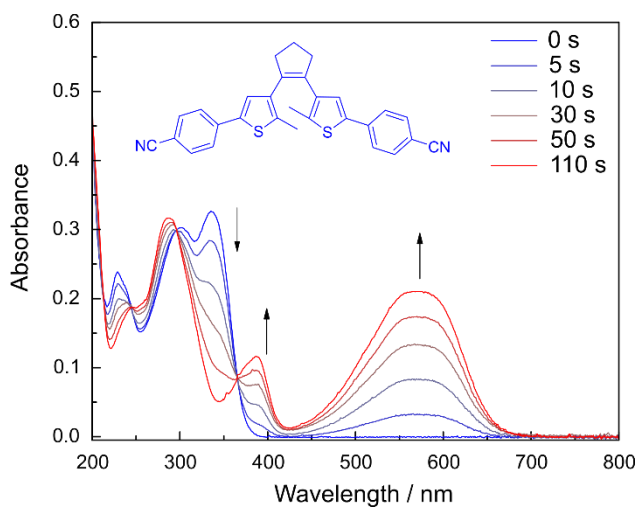

**Figure S9:** UV-vis spectra of **O-DTE-PhCN** in MeCN ( $c = 9.21 \cdot 10^{-6}$  M, 25 °C) under irradiation with 313 nm light (500 W mercury lamp, monochromator) until reaching the PSS.

### Redoxpotentials

**Table S1:** Peak potentials of sDTE and reference compounds vs Fc/Fc<sup>+</sup>. Determined in MeCN with 0.1 M Bu<sub>4</sub>NPF<sub>6</sub>.

| Compound                                              | <i>E</i><br><i>E</i> <sub>p</sub> <sup>a</sup> [V] | <i>Z</i><br><i>E</i> <sub>p</sub> <sup>a</sup> [V] | <i>C</i><br><i>E</i> <sub>p</sub> <sup>a1</sup> [V] | <i>C</i><br><i>E</i> <sub>p</sub> <sup>a2</sup> [V] | <i>Z</i><br><i>E</i> <sub>p</sub> <sup>c</sup> [V] | <i>C</i><br><i>E</i> <sub>p</sub> <sup>c</sup> [V] | Cyclization conditions |
|-------------------------------------------------------|----------------------------------------------------|----------------------------------------------------|-----------------------------------------------------|-----------------------------------------------------|----------------------------------------------------|----------------------------------------------------|------------------------|
| sDTE <sub>55</sub> -Me                                | 0.567                                              | -                                                  | -                                                   | -                                                   | -                                                  | -                                                  | none                   |
| sDTE <sub>66</sub> -Me                                | 0.517                                              | 0.494                                              | -0.126                                              | 0.168                                               | -                                                  | -                                                  | ox.                    |
| sDTE(Me <sub>2</sub> ) <sub>66</sub> -Me              | 0.601                                              | 0.561                                              | -0.055                                              | 0.292                                               | < -2.8                                             | -                                                  | ox.                    |
| sDTE <sub>77</sub> -Me                                | 0.885                                              | 0.675                                              | -0.056                                              | 0.053                                               | < -2.8                                             | -                                                  | ox.                    |
| sDTE <sub>66</sub> -Ph(CF <sub>3</sub> ) <sub>2</sub> | -                                                  | 0.785                                              | 0.152                                               | 0.462                                               | < -2.8                                             | -2.078                                             | ox.                    |
| sDTE <sub>66</sub> -PhOMe                             | -                                                  | 0.455                                              | -0.109                                              | 0.083                                               | < -2.8                                             | -2.534                                             | ox.                    |
| sDTE <sub>66</sub> -PhBr                              | -                                                  | 0.607                                              | 0.055                                               | 0.336                                               | < -2.8                                             | -2.340                                             | ox.                    |
| sDTE <sub>66</sub> -PhBr <sup>a)</sup>                | -                                                  | 0.529                                              | -0.045                                              | 0.352                                               | < -2.5                                             | -2.339                                             | ox.                    |
| sDTE <sub>66</sub> -PhCN                              | 0.635                                              | 0.651                                              | 0.098                                               | 0.389                                               | -2.526 <sup>b)</sup>                               | -1.902 <sup>c)</sup>                               | ox./red.               |
| sDTE <sub>66</sub> -PhCN <sup>a)</sup>                | 0.603                                              | 0.609                                              | 0.066                                               | 0.466                                               | < -2.5 <sup>d)</sup>                               | -2.000                                             | ox./red <sup>d)</sup>  |
| sDTE <sub>77</sub> -Ph(CF <sub>3</sub> ) <sub>2</sub> | -                                                  | 1.083                                              | 0.202                                               | 0.365                                               | -                                                  | -2.079                                             | ox.                    |
| DTE-Me                                                | -                                                  | 0.742                                              | -0.012                                              | 0.248                                               | < -2.8                                             | -2.750                                             | ox.                    |
| DTE-PhCN                                              | -                                                  | 0.930                                              | 0.180                                               | 0.444                                               | -2.436                                             | -1.816                                             | ox./red.               |
| Me <sub>2</sub> NPh-DTE-PhCN                          | -                                                  | 0.208 <sup>e)</sup>                                | -0.145                                              | 0.075                                               | -2.457                                             | -1.977 <sup>f)</sup>                               | ox.                    |
| DTE-PhFluorene <sup>a)</sup>                          | -                                                  | 0.717                                              | 0.006                                               | 0.199                                               | -2.317 <sup>g)</sup>                               | -2.072 <sup>g)</sup>                               | ox./red.               |
| Ethene-Me                                             | 0.590                                              | 0.682                                              | -                                                   | -                                                   | < -2.8                                             | -                                                  | none                   |
| Butene-Me                                             | 0.891                                              | 0.731                                              | 0.030                                               | 0.231                                               | < -2.8                                             | -                                                  | (ox.)                  |

<sup>a)</sup> in DCM <sup>b)</sup> *E*<sub>p</sub><sup>c</sup> (*E*): -2.510 V<sup>d)</sup>; -2.522 V (in DMF) <sup>c)</sup> *E*<sub>p</sub><sup>c</sup> (*C*): -1.904 V (in DMF) <sup>d)</sup> reduction of compound and electrolyte occur at similar potentials <sup>e)</sup> *E*<sub>p</sub><sup>a2</sup> (*Z*): 0.624 V <sup>f)</sup> *E*<sub>p</sub><sup>c2</sup> (*C*): -2.234 V <sup>g)</sup> in DMF

### CV measurements

All cyclovoltammograms are measured in MeCN, if not mentioned otherwise.

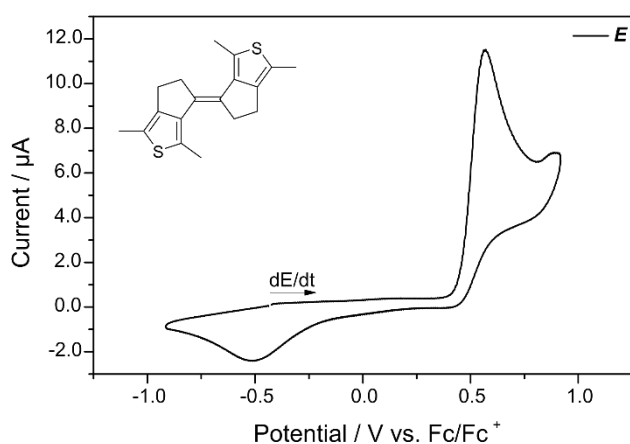

**Figure S10:** Cyclic voltammogram of **E-sDTE<sub>55</sub>-Me** ( $c = 1 \cdot 10^{-3}$  M).

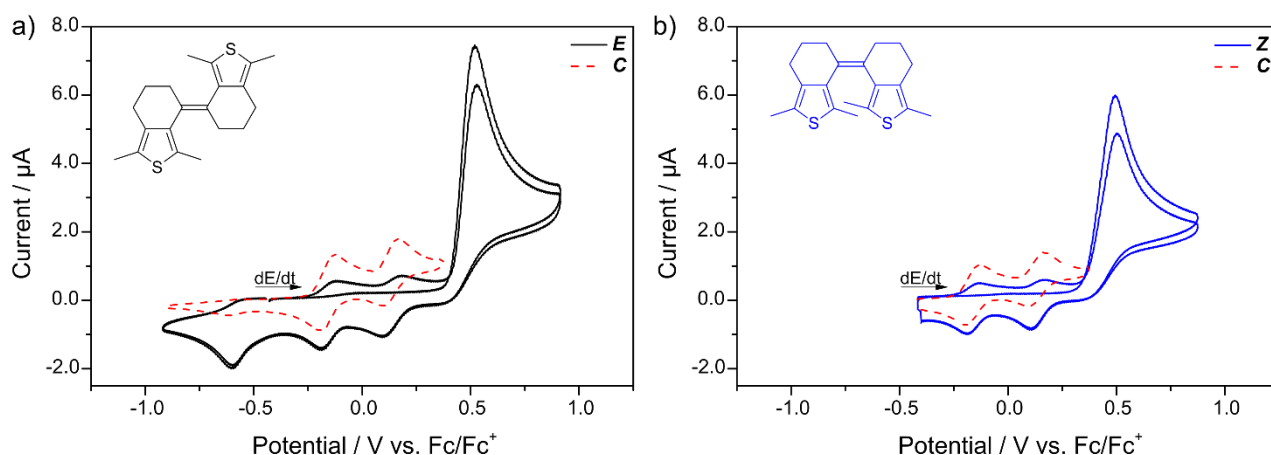

**Figure S11:** Two consecutive cyclic voltammograms of *E*-sDTE<sub>66</sub>-Me ( $c = 1 \cdot 10^{-3}$  M) and *Z*-sDTE<sub>66</sub>-Me ( $c = 7.5 \cdot 10^{-4}$  M).

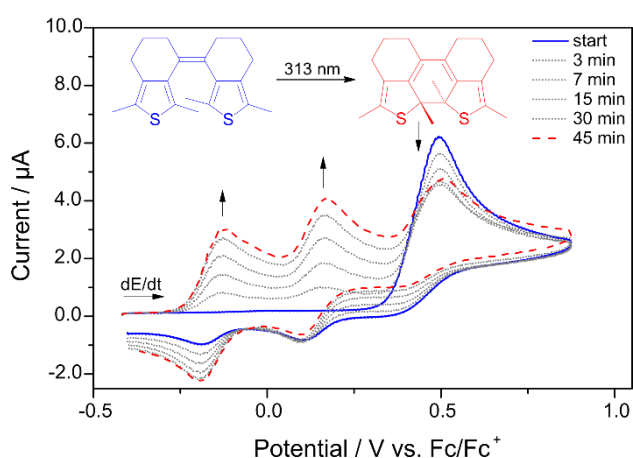

**Figure S12:** Changes in the cyclic voltammogram during cyclization of *Z*-sDTE<sub>66</sub>-Me ( $c = 1 \cdot 10^{-3}$  M in DCM) by irradiation with 313 nm light.

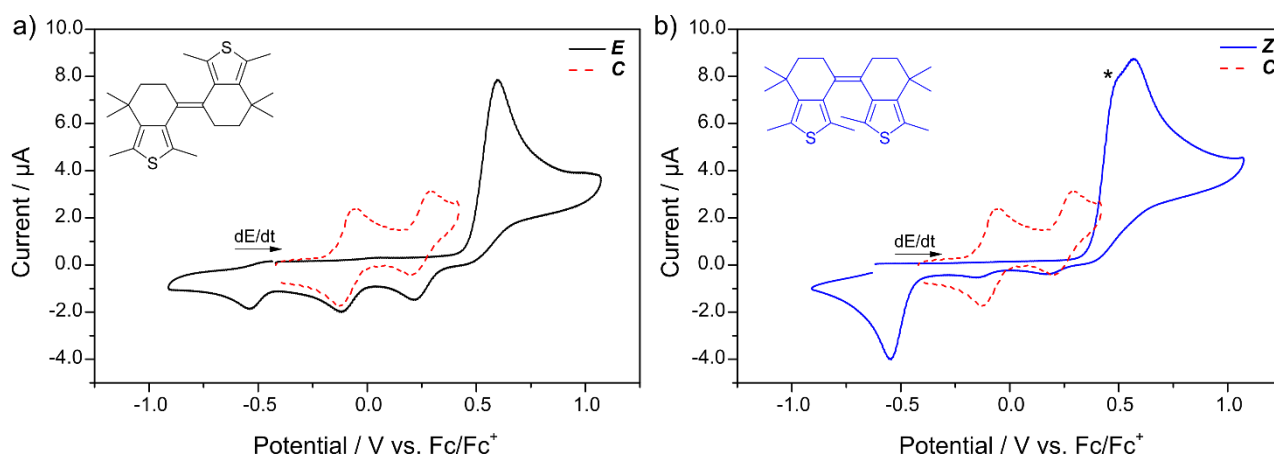

**Figure S13:** Cyclic voltammogram of *E*-sDTE(Me<sub>2</sub>)<sub>66</sub>-Me and *Z*-sDTE(Me<sub>2</sub>)<sub>66</sub>-Me ( $c = 1 \cdot 10^{-3}$  M). As it is not obtained in synthesis, *Z*-sDTE(Me<sub>2</sub>)<sub>66</sub>-Me was generated in situ by a cyclization/cycloreversion sequence starting from *E*-sDTE(Me<sub>2</sub>)<sub>66</sub>-Me. The shoulder (\*) is attributed to byproducts formed during irradiation.

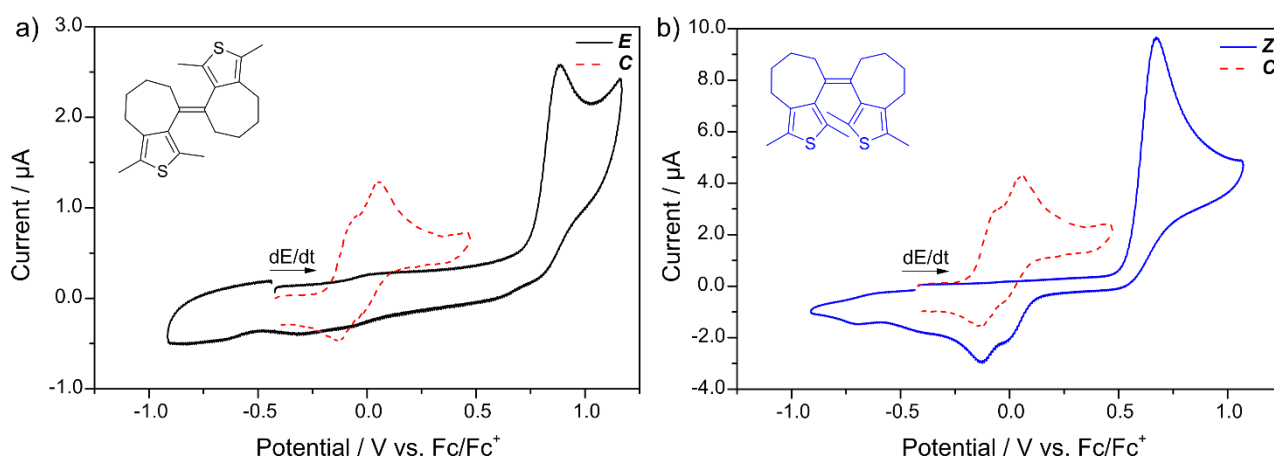

**Figure S14:** Cyclic voltammogram of *E*-sDTE<sub>77</sub>-Me ( $c = 5 \cdot 10^{-4}$  M) and *Z*-sDTE<sub>77</sub>-Me ( $c = 1 \cdot 10^{-3}$  M).

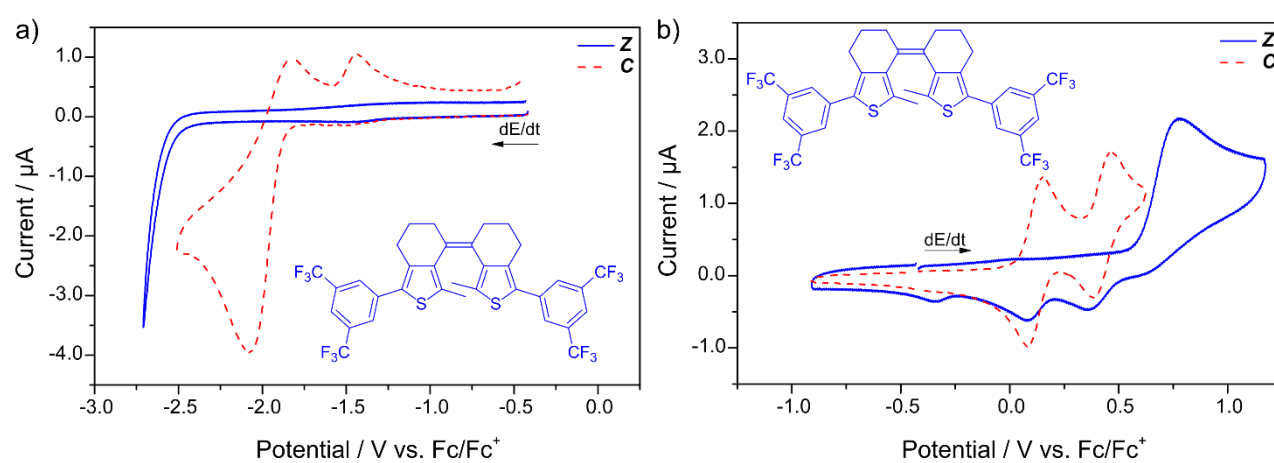

**Figure S15:** Cyclic voltammogram of *Z*-sDTE<sub>66</sub>-Ph(CF<sub>3</sub>)<sub>2</sub> ( $c = 5 \cdot 10^{-4}$  M).

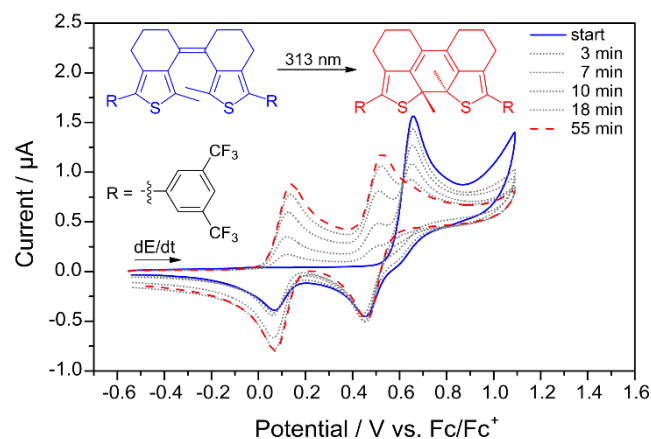

**Figure S16:** Changes in the cyclic voltammogram during cyclization of *Z*-sDTE<sub>66</sub>-Ph(CF<sub>3</sub>)<sub>2</sub> ( $c = 1 \cdot 10^{-3}$  M in DCM) by irradiation with 313 nm light.

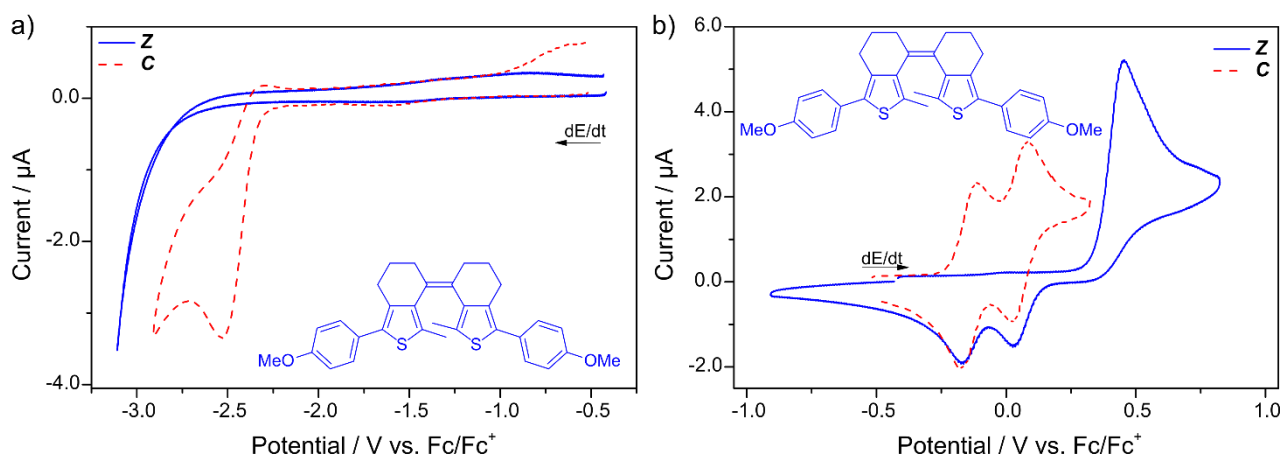

**Figure S17:** Cyclic voltammogram of **Z-sDTE<sub>66</sub>-PhOMe** ( $c = 1 \cdot 10^{-3}$  M).

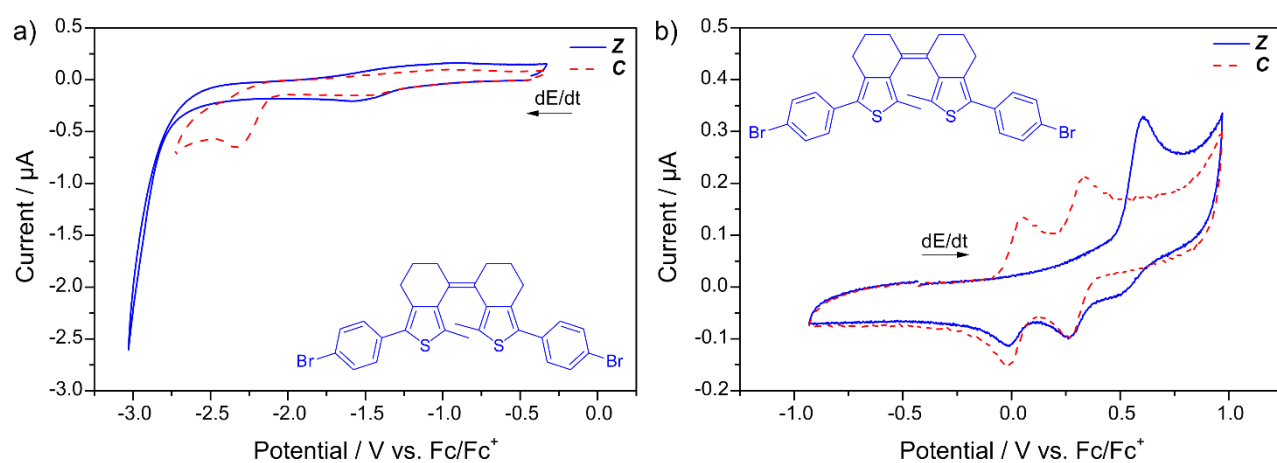

**Figure S18:** Cyclic voltammogram of **Z-sDTE<sub>66</sub>-PhBr** ( $c < 5 \cdot 10^{-4}$  M). Voltammogram obtained from DCM solution is similar.

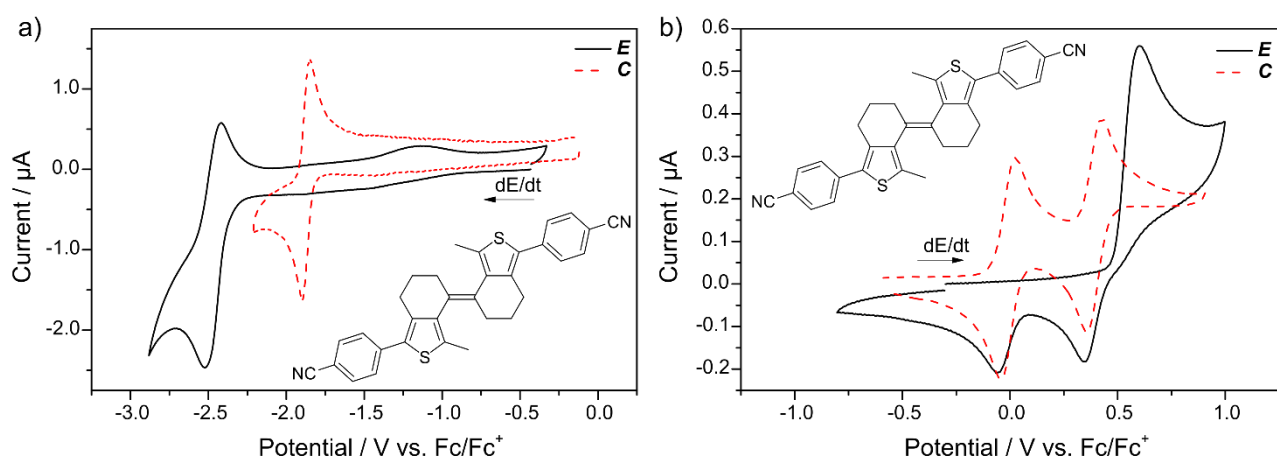

**Figure S19:** Cyclic voltammogram of **E-sDTE<sub>66</sub>-PhCN** ( $c = 5 \cdot 10^{-4}$  M) a) in DMF and b) in DCM. Measurements in a Microcell [4] (rhd-instruments; Pt-disc  $d = 0.25$  mm, scan rate  $dE/dt = 1 \text{ V s}^{-1}$ ).



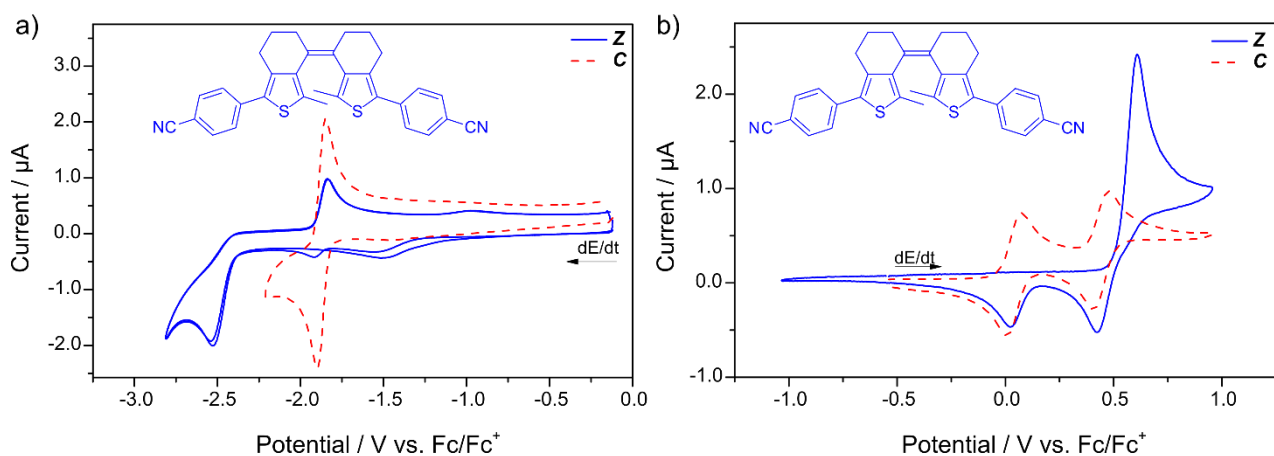

**Figure S20:** Cyclic voltammogram of **Z-sDTE<sub>66</sub>-PhCN** ( $c = 1 \cdot 10^{-3}$  M) a) in MeCN and b) in DCM.

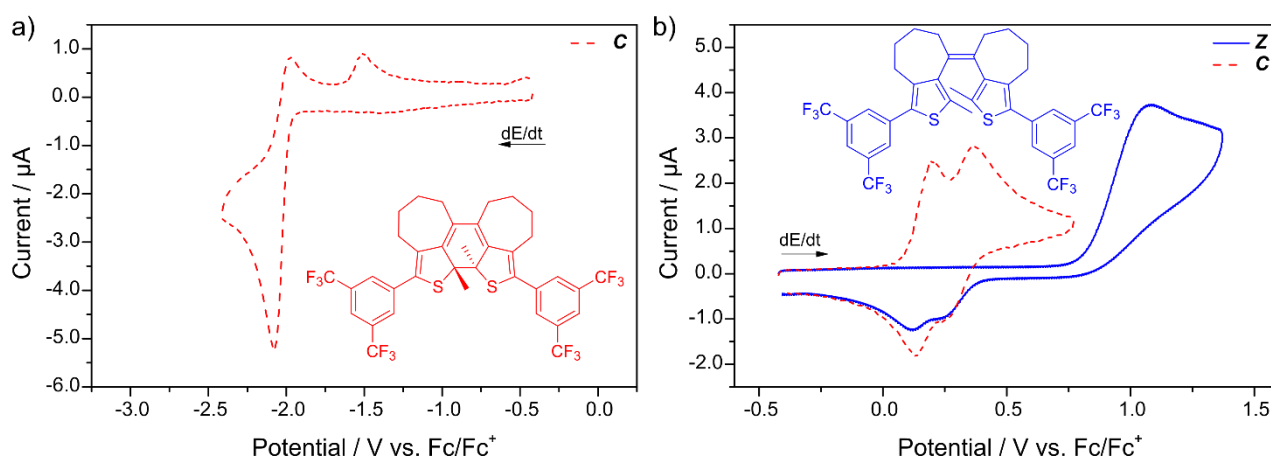

**Figure S21:** Cyclic voltammogram of **Z-sDTE<sub>77</sub>-Ph(CF<sub>3</sub>)<sub>2</sub>** ( $c = 5 \cdot 10^{-4}$  M).

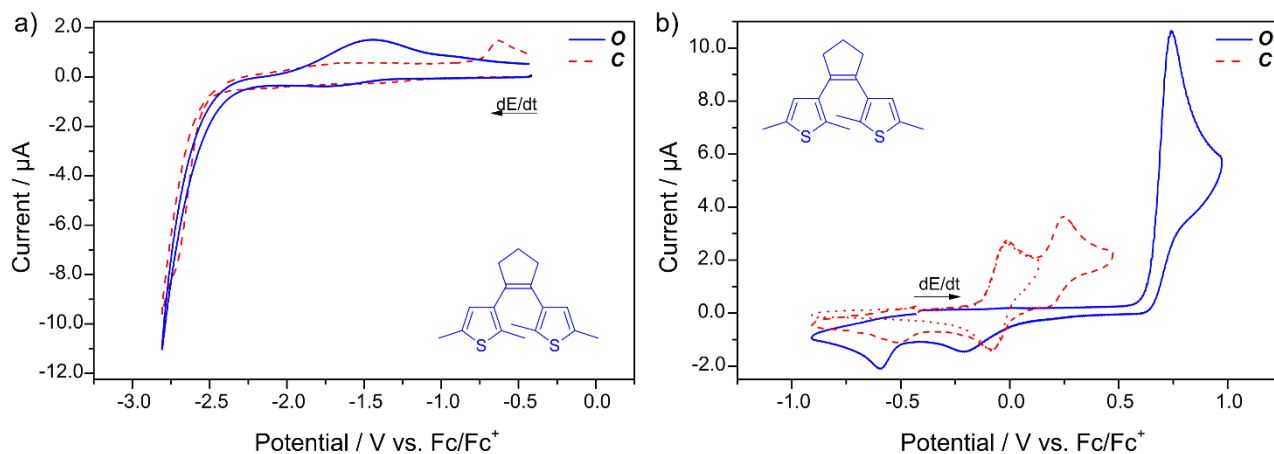

**Figure S22:** Cyclic voltammogram of **O-DTE-Me** ( $c = 1 \cdot 10^{-3}$  M).

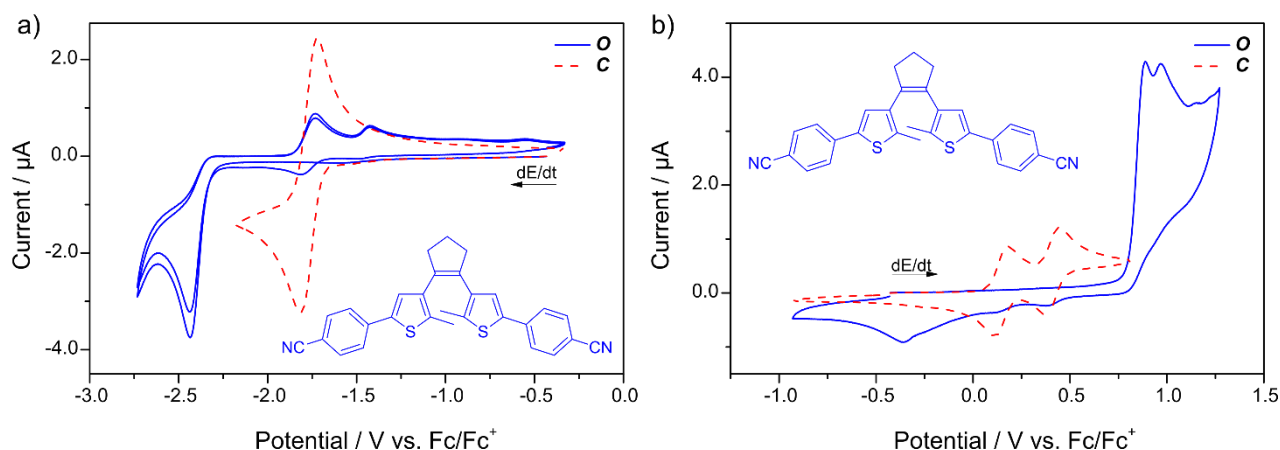

**Figure S23:** Two consecutive cyclovoltammetric cycles and cyclic voltammogram of **O-DTE-PhCN** ( $c = 1 \cdot 10^{-3}$  M).

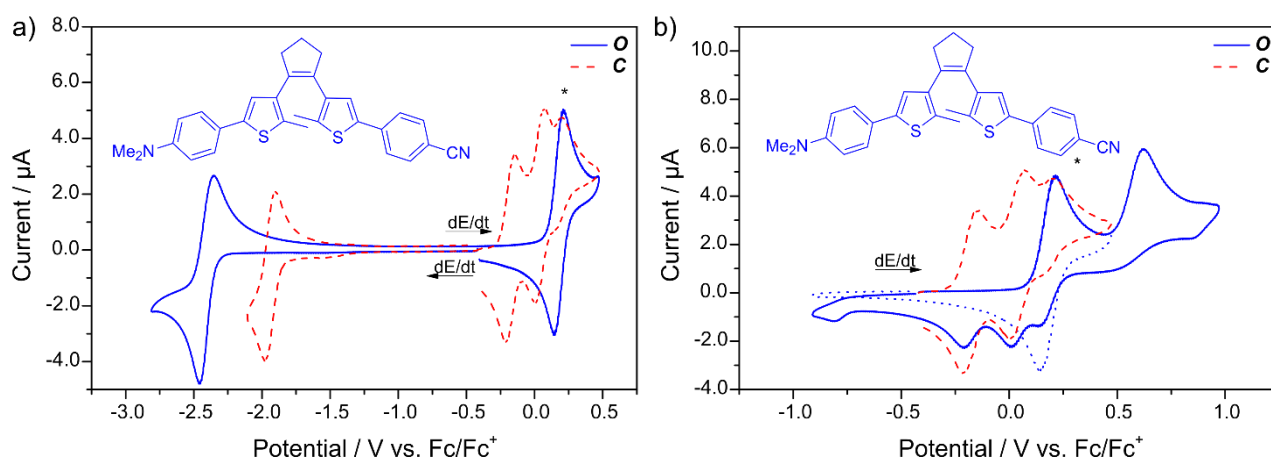

**Figure S24:** Cyclic voltammogram of **O-Me<sub>2</sub>NPh-DTE-PhCN** ( $c = 1 \cdot 10^{-3}$  M). The first oxidation and reduction of **O-Me<sub>2</sub>NPh-DTE-PhCN** is reversible. The shoulder (\*) in the cyclovoltammograms of **C** is attributed to residual open isomer.

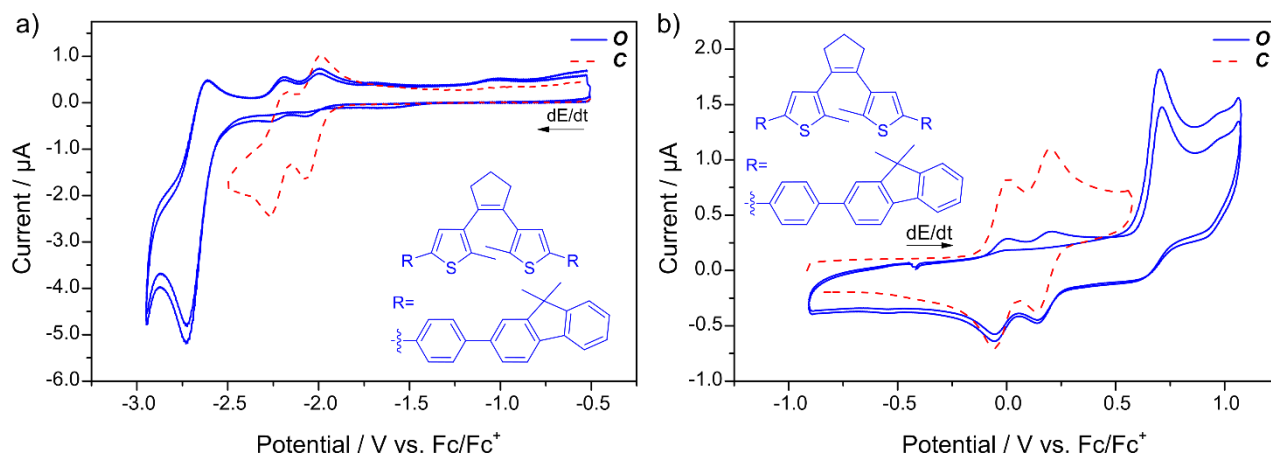

**Figure S25:** Two consecutive cyclovoltammetric cycles of **O-DTE-PhFluorene** a) in DMF ( $c = 1 \cdot 10^{-3}$  M) and b) in DCM ( $c = 7 \cdot 10^{-4}$  M).

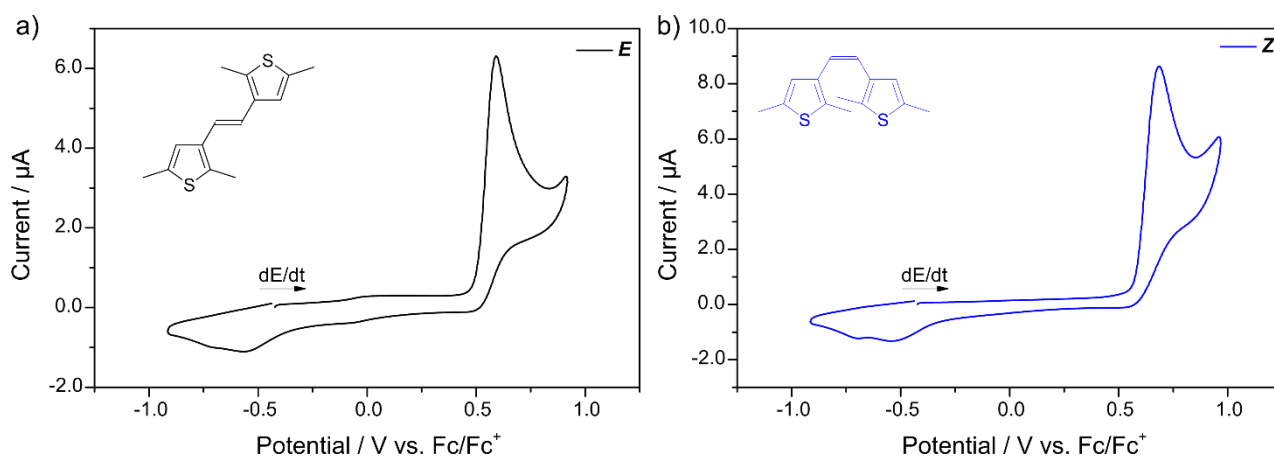

**Figure S26:** Cyclic voltammogram of *E*-ethene-Me and *Z*-ethene-Me ( $c = 1 \cdot 10^{-3}$  M).

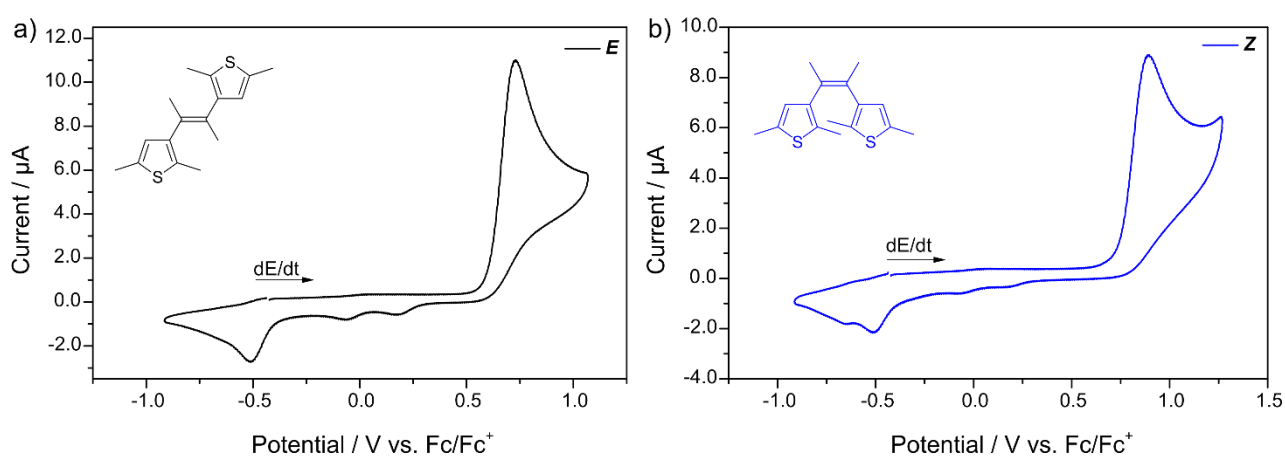

**Figure S27:** Cyclic voltammogram *E*-butene-Me and *Z*-butene-Me ( $c = 1 \cdot 10^{-3}$  M).

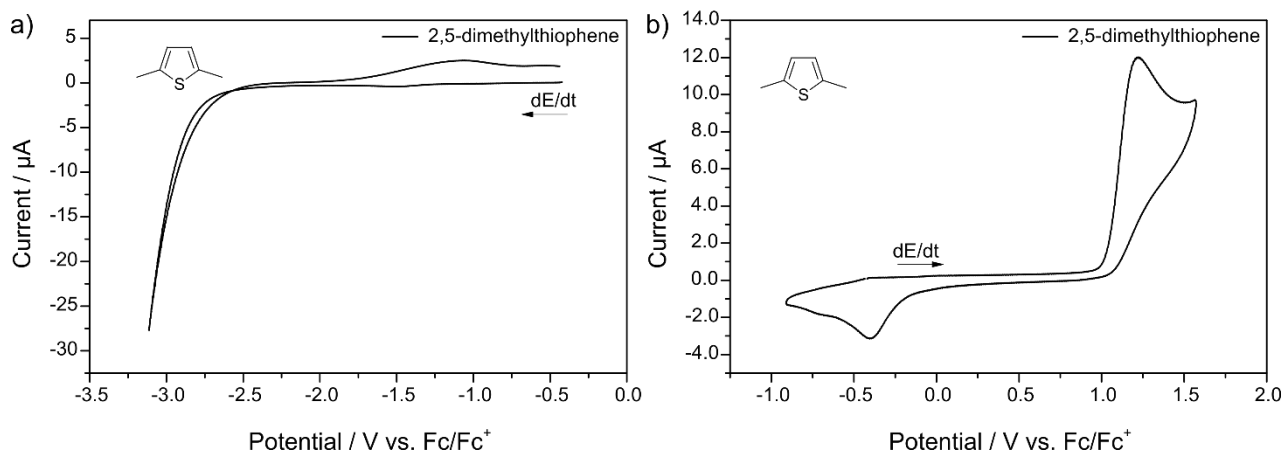

**Figure S28:** Cyclic voltammogram of 2,5-dimethylthiophene ( $c = 1 \cdot 10^{-3}$  M).

### SEC Measurements

All SEC measurements are carried out in MeCN, if not mentioned otherwise.

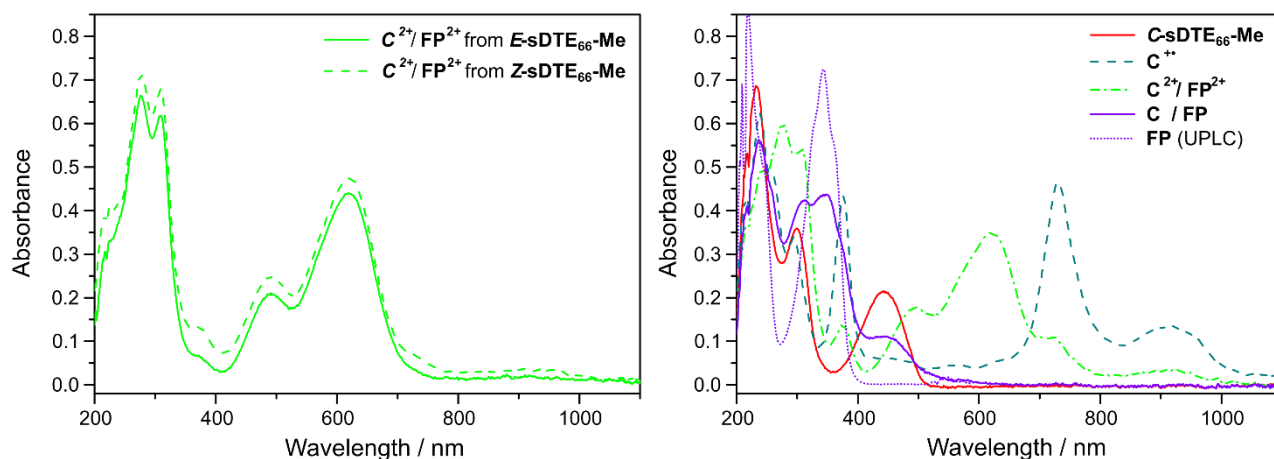

**Figure S29:** SEC of sDTE<sub>66</sub>-Me. a (left)) Comparison of UV-vis spectra of  $C^{2+}/FP^{2+}$  formed from *E*- and *Z*-sDTE<sub>66</sub>-Me. b (right)) Spectra of all species involved at the respective redox wave maximum. For comparison, the absorption spectrum of *FP* extracted from the UPLC (Figure S41e, UPLC 2) is added as reference. The interaction of eluent mixture (MeCN/H<sub>2</sub>O/formic acid) with  $FP^{2+}$  solution injected accounts for the same transformation as under reductive conditions.

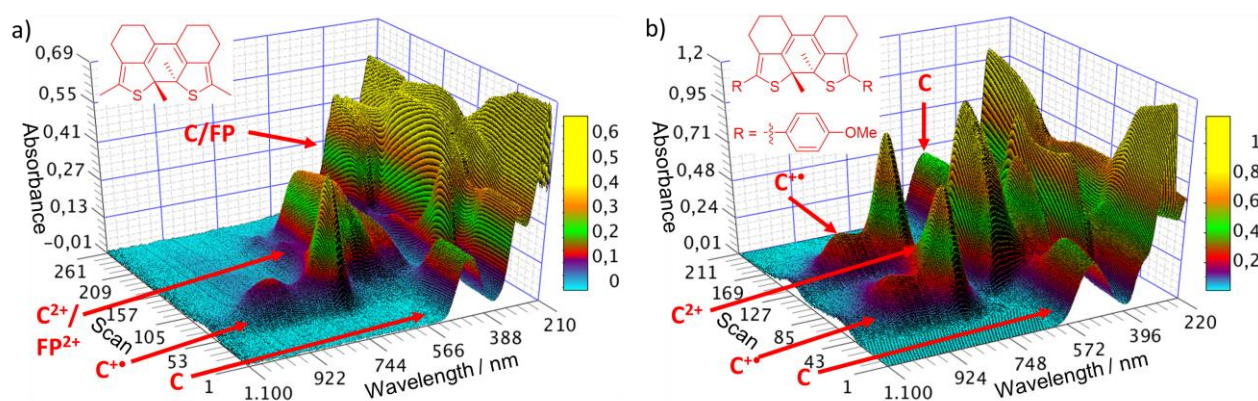

**Figure S30:** Full SEC cycles. a) The oxidation of *C*-sDTE<sub>66</sub>-Me ( $c = 5 \cdot 10^{-4}$  M) is not reversible and leads to formation of a mixture of *C* and *FP*. Start and return potentials at  $-0.52$  V,  $0.32$  V and  $-0.73$  V. b) For *C*-sDTE<sub>66</sub>-PhOMe ( $c = 5 \cdot 10^{-4}$  M) the formation of the hypsochromic cationic radical  $C^{+\bullet}$  and dicationic  $C^{2+}$  is fully reversible. Start and return potentials at  $-0.66$  V,  $0.34$  V and  $-0.97$  V.

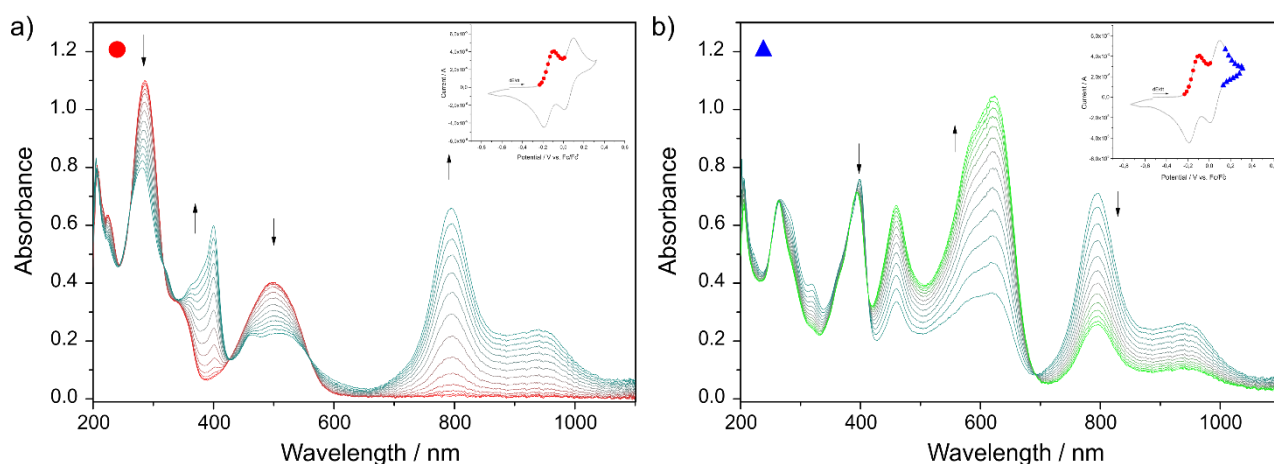

**Figure S31:** Changes in the UV-vis spectra during cyclic voltammetry of **C-sDTE<sub>66</sub>-PhOMe** ( $c = 5.0 \cdot 10^{-4}$  M). a) Build-up of the radical cation  $C^{\bullet+}$  and b) the dication  $C^{2+}$ .

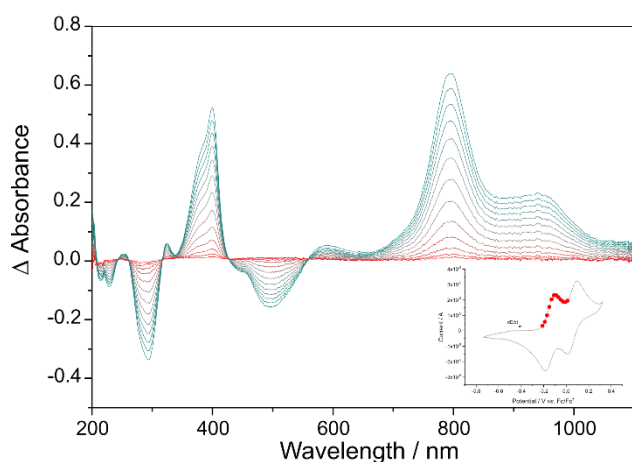

**Figure S32:** Measured difference spectra for the build-up of the radical cation  $C^{\bullet+}$  from **C-sDTE<sub>66</sub>-PhOMe** ( $c = 5.0 \cdot 10^{-4}$  M).

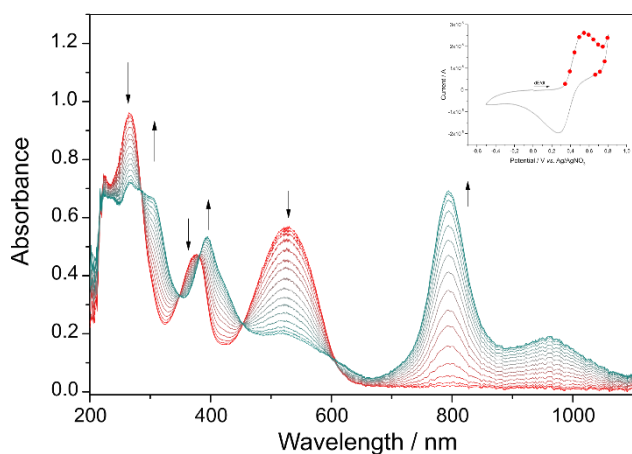

**Figure S33:** Changes in the UV-vis-spectra during cyclic voltammetry of **C-sDTE<sub>66</sub>-Ph(CF<sub>3</sub>)<sub>2</sub>** ( $c = 5 \cdot 10^{-4}$  M in DCM) for the build-up of the radical cation  $C^{\bullet+}$ .

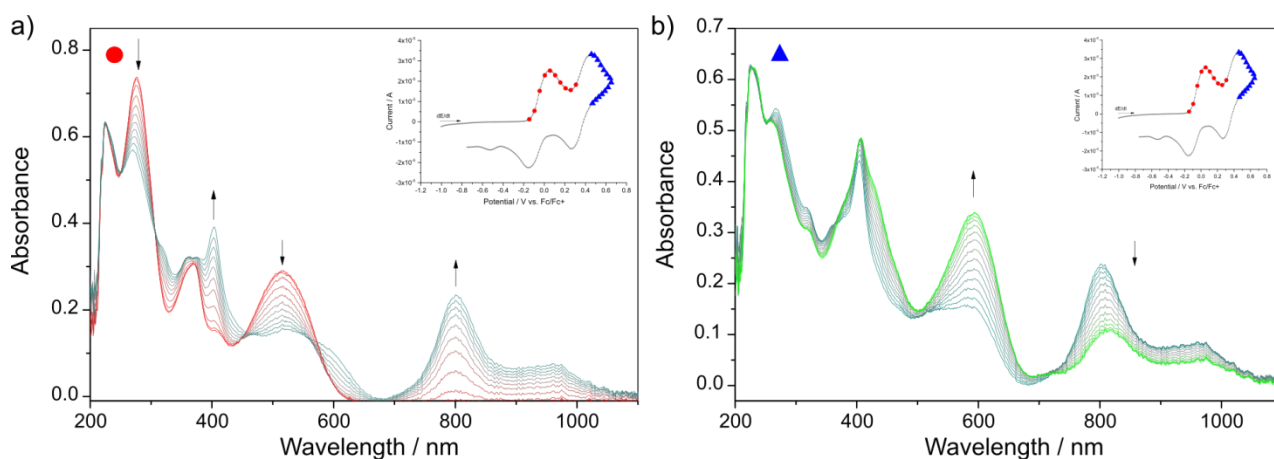

**Figure S34:** Changes in the UV-vis spectra during cyclic voltammetry of **C-sDTE<sub>66</sub>-PhBr** ( $c = 5 \cdot 10^{-4}$  M in DCM). a) Build-up of the radical cation **C<sup>•+</sup>** and b) the dication **C<sup>2+</sup>**.

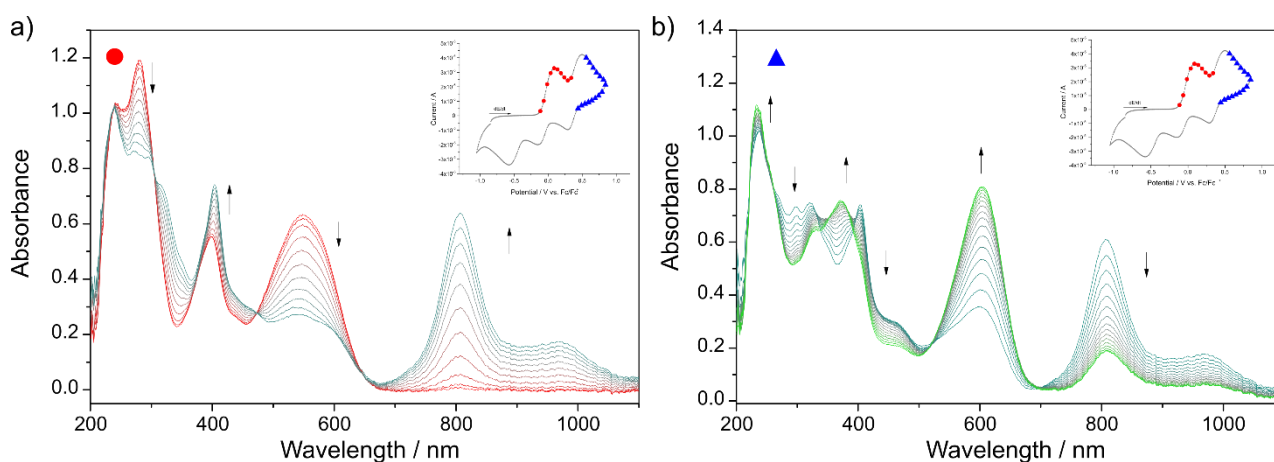

**Figure S35:** Changes in the UV-vis spectra during cyclic voltammetry of **C-sDTE<sub>66</sub>-PhCN** ( $c = 5 \cdot 10^{-4}$  M in DCM). a) Build-up of the radical cation **C<sup>•+</sup>** and b) the dication **C<sup>2+</sup>**.

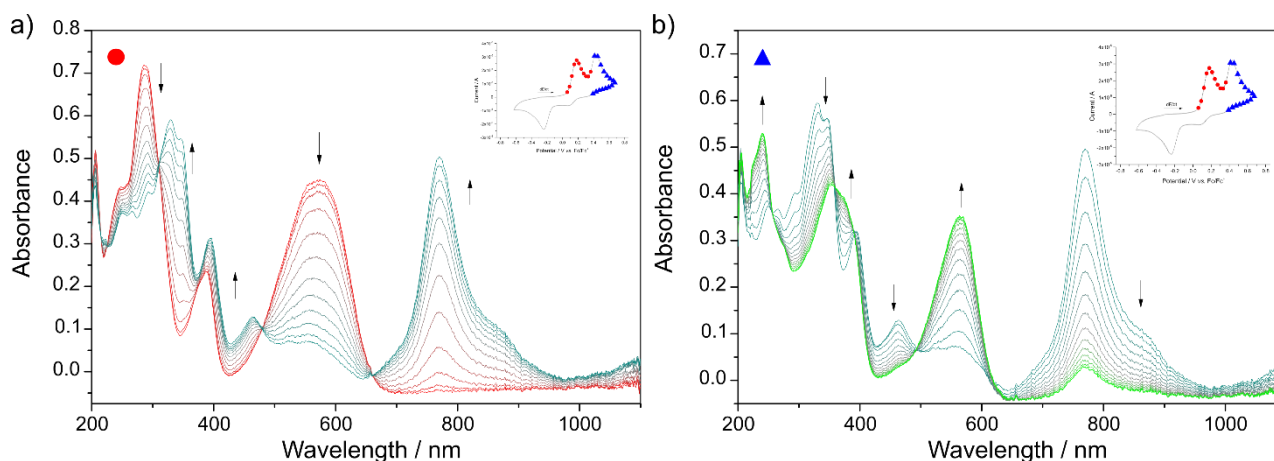

**Figure S36:** Changes in the UV-vis spectra during cyclic voltammetry of **C-DTE-PhCN** ( $c = 5 \cdot 10^{-4}$  M). a) Build-up of the radical cation **C<sup>•+</sup>** and b) the dication **C<sup>2+</sup>**.



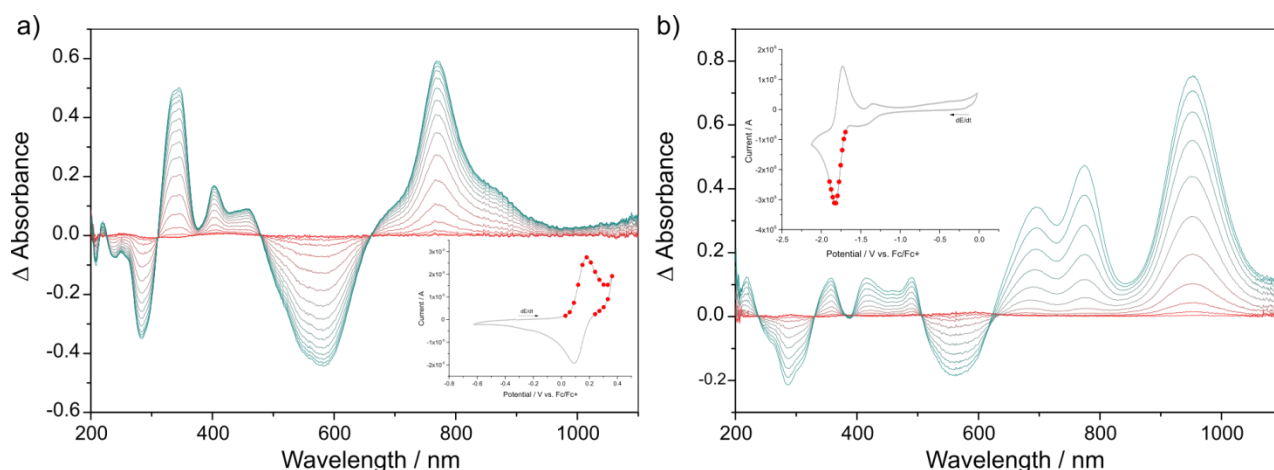

**Figure S37:** Measured difference spectra for a) the build-up of the radical cation  $C^{+\bullet}$  from  $C$ -DTE-PhCN ( $c = 5 \cdot 10^{-4}$  M) and b) the radical anion  $C^{\bullet-}$ .

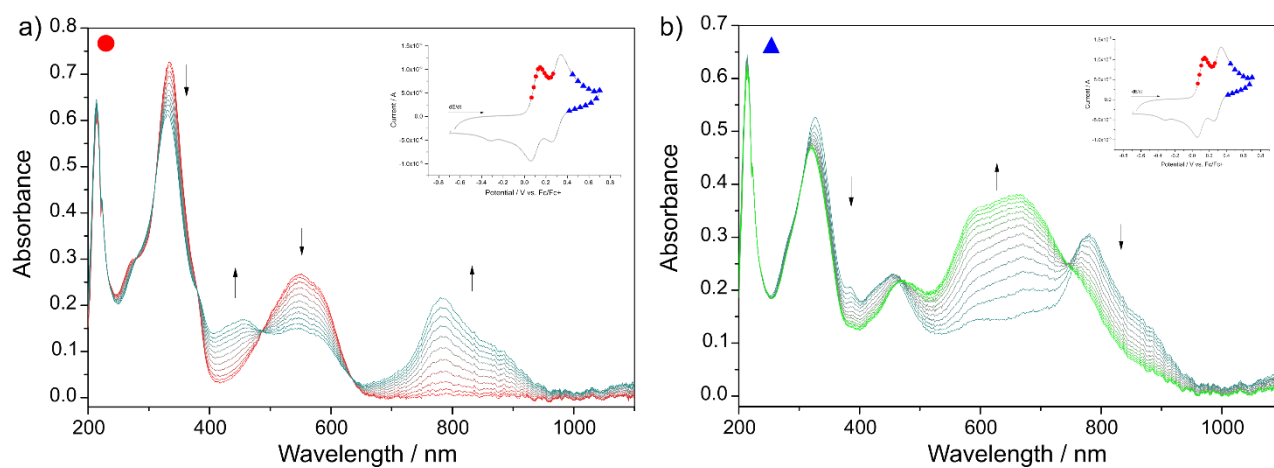

**Figure S38:** Changes in the UV-vis-spectra during cyclic voltammetry of  $C$ -DTE-PhFluorene ( $c = 2.1 \cdot 10^{-4}$  M). a) Build-up of the radical cation  $C^{+\bullet}$  and b) the dication  $C^{2+}$ .

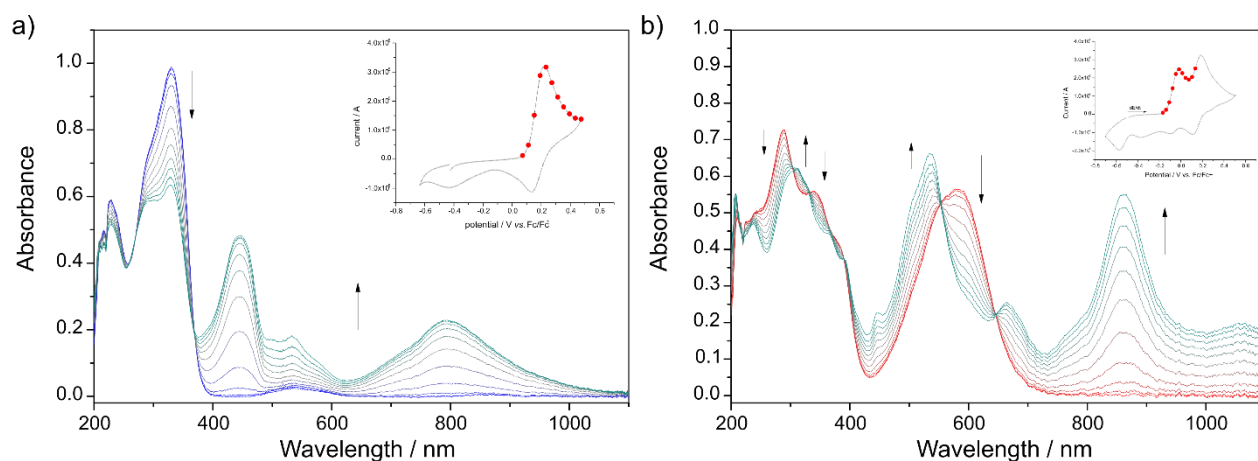

**Figure S39:** Changes in the UV-vis-spectra during cyclic voltammetry. a) Build-up of the radical cation  $O^{+\bullet}$  from  $O$ -Me<sub>2</sub>NPh-DTE-PhCN ( $c = 6.8 \cdot 10^{-4}$  M) and b) the radical cation  $C^{+\bullet}$  from  $C$ -Me<sub>2</sub>NPh-DTE-PhCN ( $c = 3.8 \cdot 10^{-4}$  M).

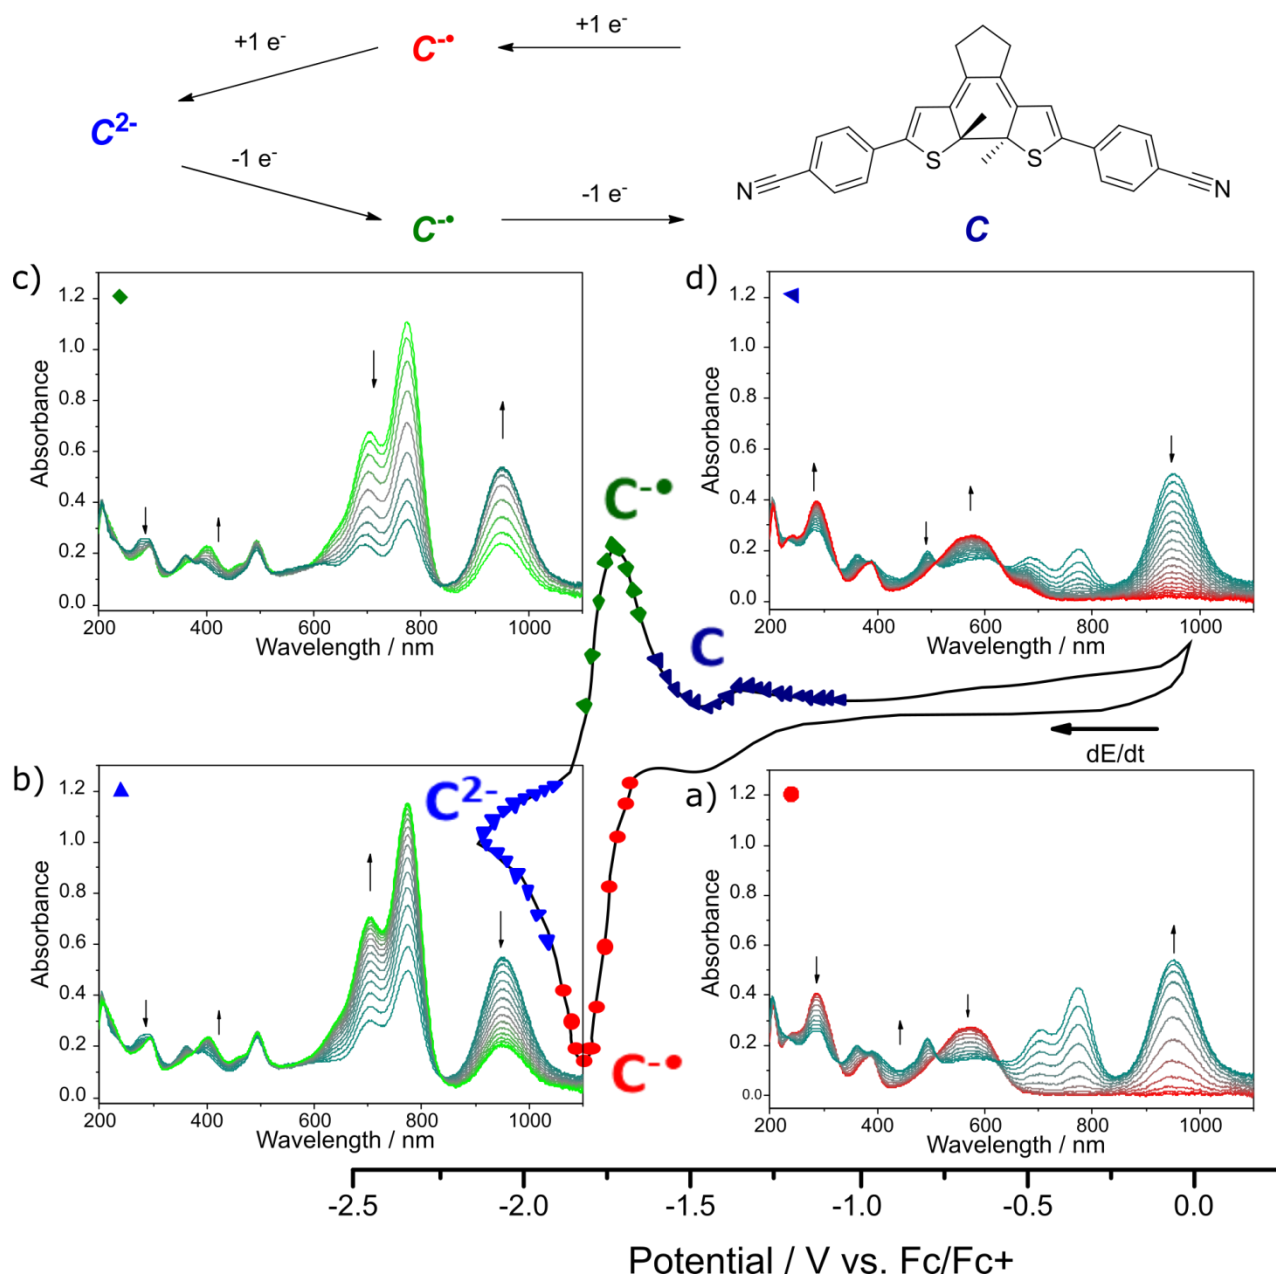

**Figure S40:** SEC analysis of **C-DTE-PhCN**. a) The initial formation of  $C^{\bullet-}$  is indicated by a continuous increase in the far red-shifted band at 953 nm, typical for radicals. It is accompanied by formation of  $C^{2-}$ , as visible by its two absorption bands at 774 nm and 705 nm. b) Though not quantitatively,  $C^{\bullet-}$  subsequently is depleted in favor of  $C^{2-}$ , proving the parallel existence of both species. c) Re-oxidation stimulates the inverse shift of the equilibrium, d) with the offset of the oxidation wave showing the spectral fingerprint of the neutral closed isomer **C**. The small hump around  $E_p^{C^{\bullet-}} = -1.5$  V is assigned to residual oxygen in the reaction mixture.



## Preparative Electrolysis

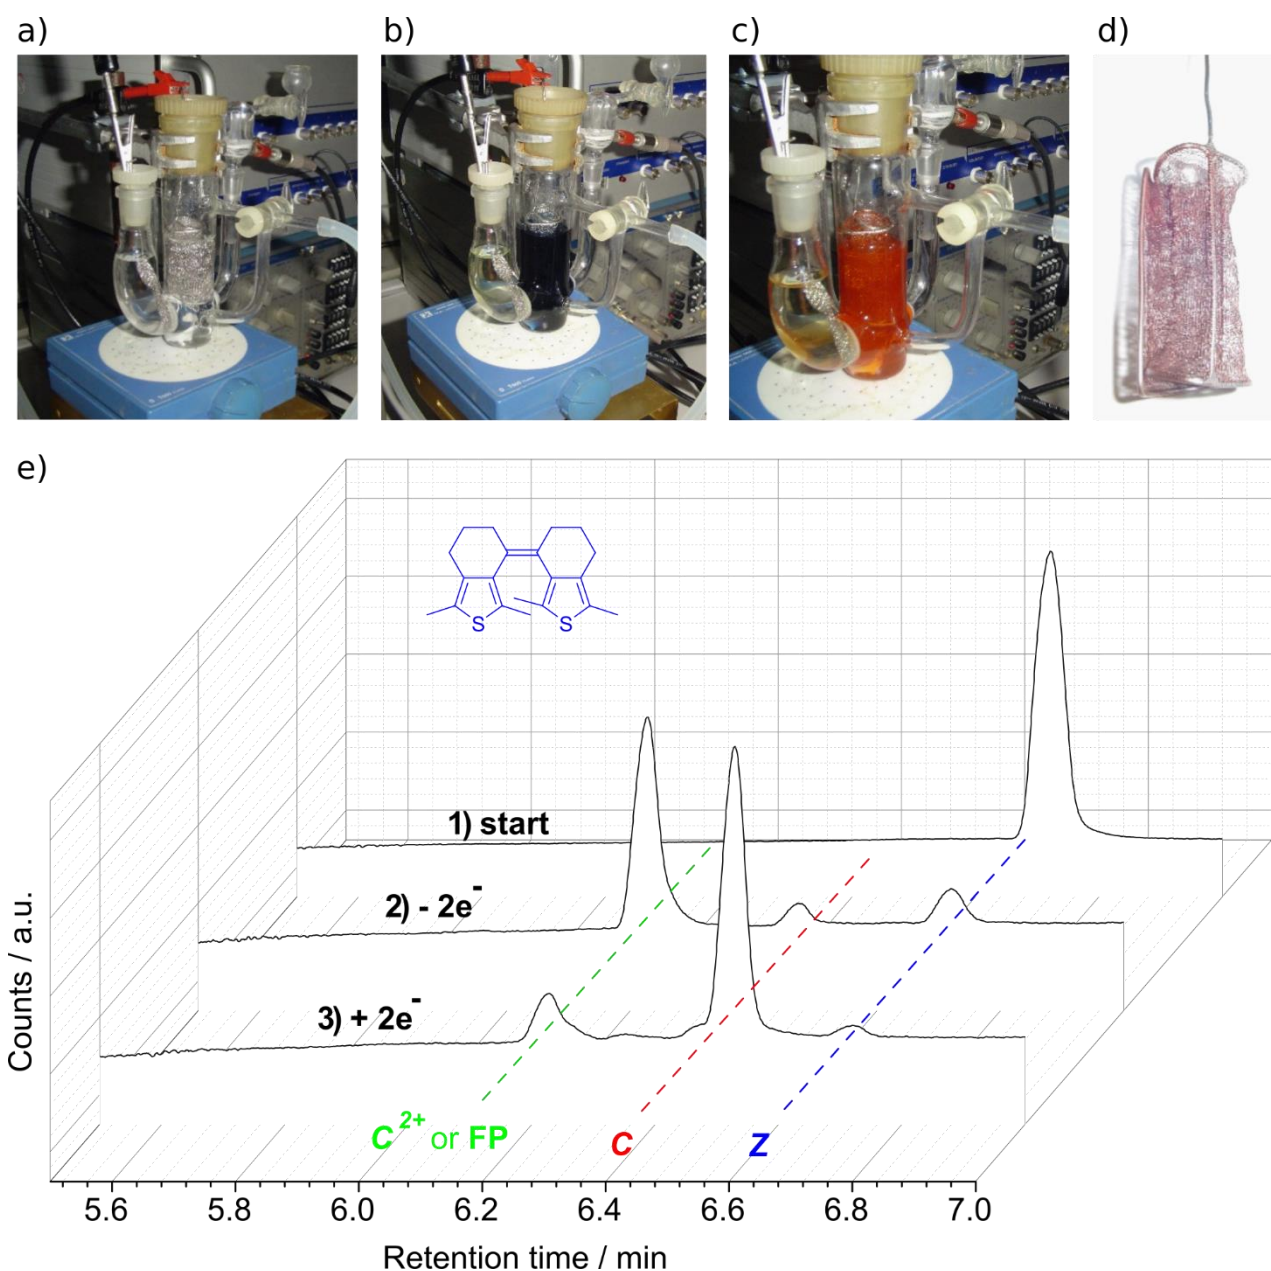

**Figure S41:** Preparative potentiostatic electrolysis of **Z-sDTE<sub>66</sub>-Me**. Photographs of a) Initial solution b) after oxidation c) after re-reduction. The follow-up product partially stays in solution and d) partially deposits on the platin electrode as copper-colored film e) UPLC diode array traces of initial solution (**Z-sDTE<sub>66</sub>-Me** only), after oxidation (mainly **FP**) and final solution after filtration (mainly **C-sDTE<sub>66</sub>-Me**, HR-MS (ESI<sup>+</sup>)  $m/z = 329.1364$  (calcd. 329.1398 for  $[C_{20}H_{24}S_2+H]^+$ )). All UPLC measurements with MeCN/H<sub>2</sub>O (0.1% formic acid) as eluent.

Procedure: 7.932 mg of **Z-sDTE<sub>66</sub>-Me** in 45 mL 0.1 M Bu<sub>4</sub>NPF<sub>6</sub> in MeCN (trace 1), oxidation on a platin-net electrode in a double-H-cell at  $E = 1.0$  V [SCE] ( $I_{\text{start}} = 20$  mA,  $I_{\text{end}} = 1.25$  mA;  $Q = 4950$  mC  $\rightarrow$  106 % for  $2e^-/\text{mol}$ ) (trace 2). Then re-reduction at  $E = -1.0$  V [SCE] ( $I_{\text{start}} = -50$  mA,  $I_{\text{end}} = -2.5$  mA;  $Q = -4939$  mC) (trace 3).

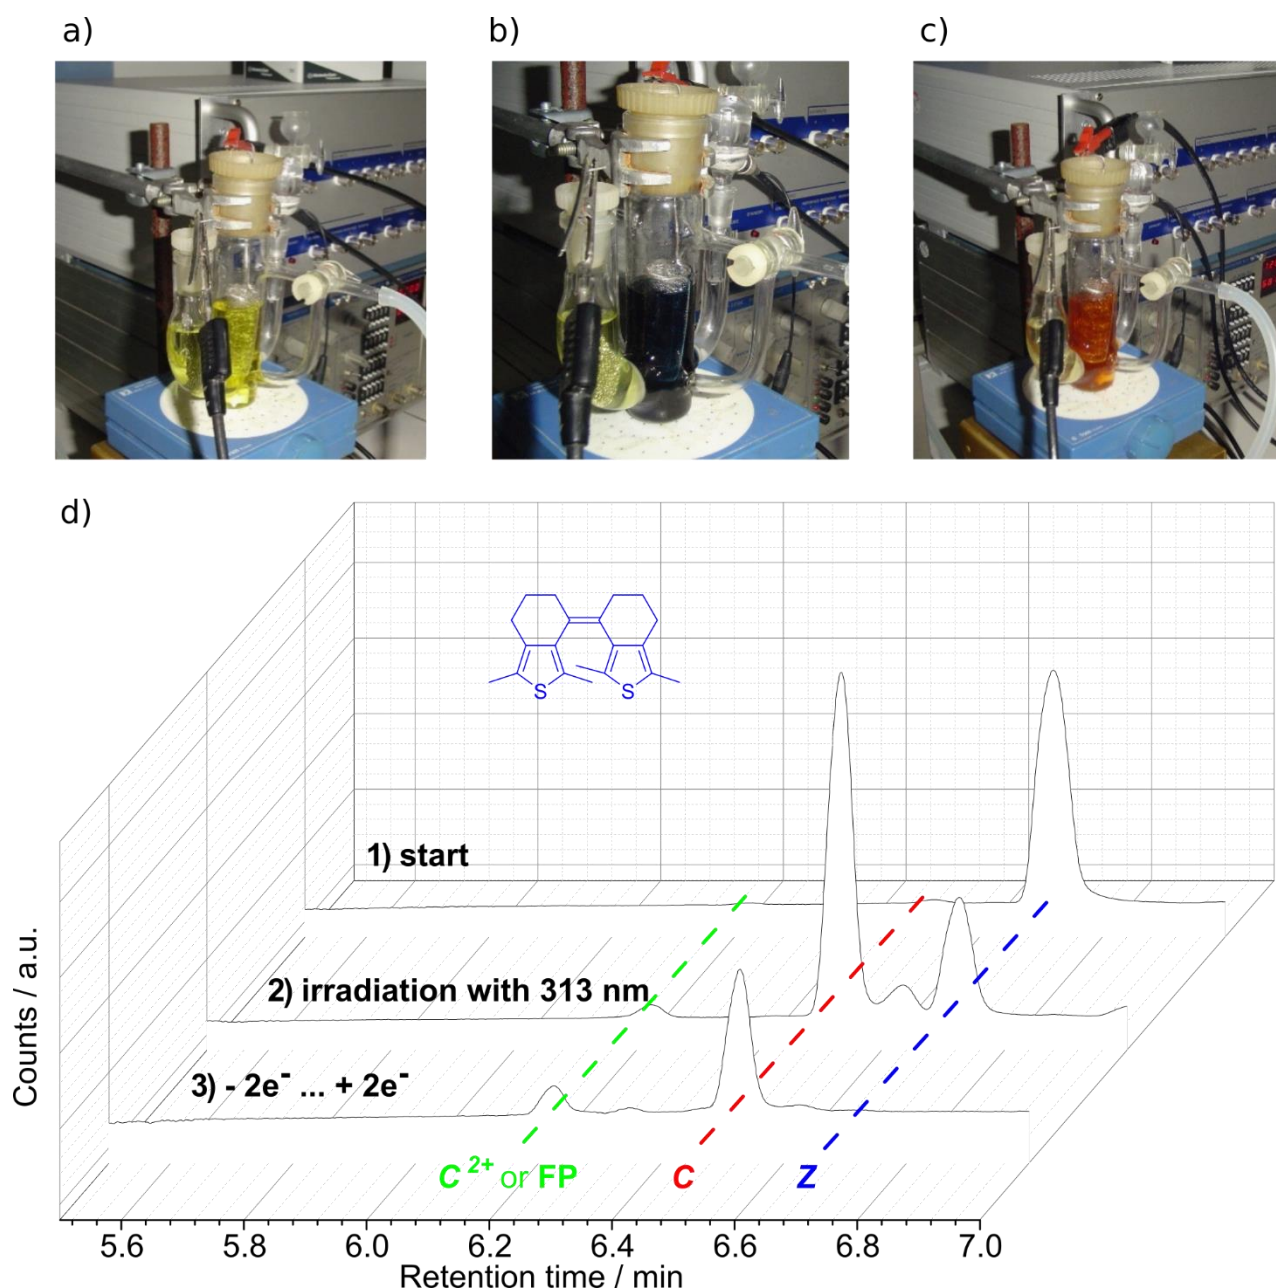

**Figure S42:** Preparative potentiostatic electrolysis of **C-sDTE<sub>66</sub>-Me**. Photos of a) Initial solution of **Z-sDTE<sub>66</sub>-Me** b) after irradiation with UV light c) after oxidation-reduction sequence. The follow-up product partially stays in solution and partially deposits on platin electrode as copper-colored film d) UPLC diode array trace of initial solution (**Z-sDTE<sub>66</sub>-Me** only), after irradiation (74% **C-sDTE<sub>66</sub>-Me**) and final solution after filtration (mainly **C-sDTE<sub>66</sub>-Me**, HR-MS (ESI<sup>+</sup>)  $m/z$  = 329.1374 (calcd. 329.1398 for [C<sub>20</sub>H<sub>24</sub>S<sub>2</sub>+H]<sup>+</sup>)). All UPLC measurements with MeCN/H<sub>2</sub>O (0.1% formic acid) as eluent.

Procedure: 5.719 mg of **Z-sDTE<sub>66</sub>-Me** in 45 mL 0.1 M Bu<sub>4</sub>NPF<sub>6</sub> in MeCN (trace 1), irradiated with 313 nm (TLC lamp) for 30 min in a double-H-cell (trace 2), then oxidation on a platin-net electrode in a double-H-cell at  $E = 0.8$  V [SCE] (corresponding to **C<sup>2+</sup>**) ( $I_{\text{start}} = 21$  mA,  $I_{\text{end}} = 1.0$  mA;  $Q = 3120$  mC  $\rightarrow$  93 % for 2e<sup>-</sup>/mol). Subsequent re-reduction at  $E = -0.9$  V [SCE] ( $I_{\text{start}} = -40$  mA,  $I_{\text{end}} = -2.0$  mA;  $Q = -2800$  mC) (trace 3).

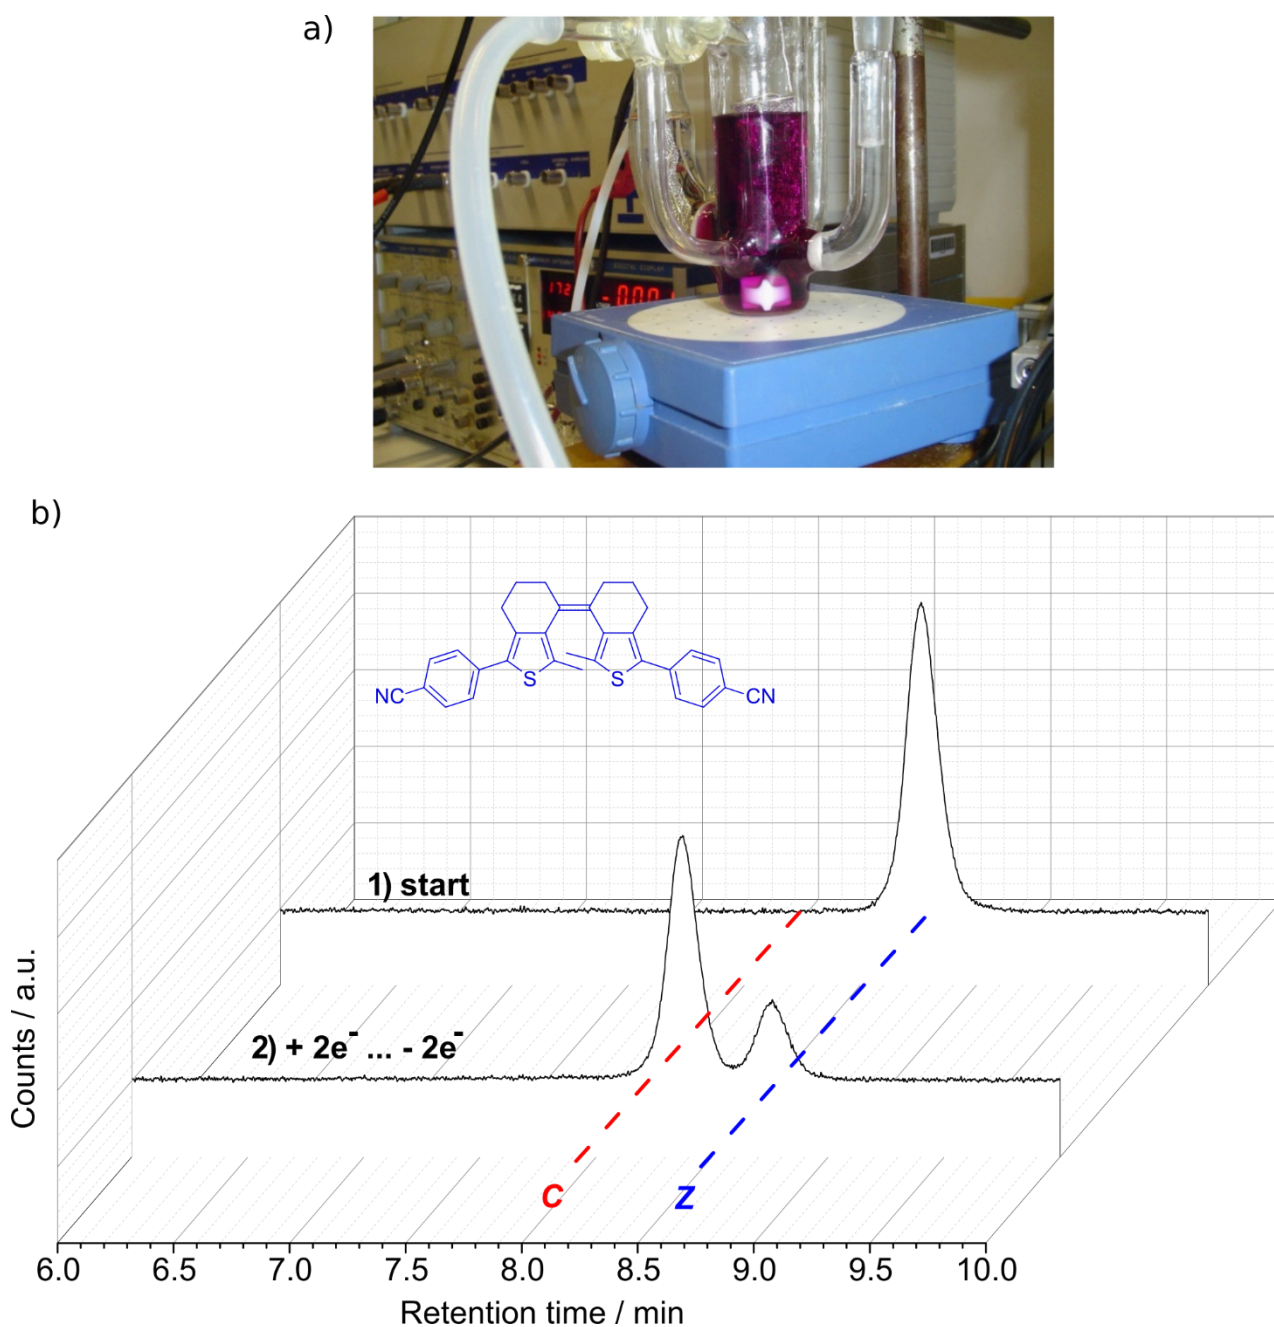

**Figure S43:** Preparative potentiostatic electrolysis of **Z-sDTE<sub>66</sub>-PhCN**. a) Photo after reduction-oxidation sequence. b) UPLC diode array trace at isosbestic point of initial solution (**Z-sDTE<sub>66</sub>-PhCN** only) and final solution (mainly **C-sDTE<sub>66</sub>-PhCN**, C:Z = 69:31). All UPLC measurements with MeCN/H<sub>2</sub>O (0.1% formic acid) as eluent.

Procedure: 5.2 mg of **Z-sDTE<sub>66</sub>-Me** in 45 mL 0.1 M Bu<sub>4</sub>NPF<sub>6</sub> in MeCN (trace 1), filtrated through syringe filter before reduction on a platin-net electrode in a double-H-cell at  $E = -2.9$  V vs. Fc/Fc<sup>+</sup> ( $Q = -3000$  mC  $\rightarrow$  150 % for 2e<sup>-</sup>/mol). Then directly re-oxidation at  $E = -0.4$  V vs. Fc/Fc<sup>+</sup> ( $Q = -1700$  mC  $\rightarrow$  85% for 2e<sup>-</sup>/mol) (trace 2).

## References

- [1] L. N. Lucas, J. J. D. de Jong, J. H. van Esch, R. M. Kellogg, B. L. Feringa, *Eur. J. Org. Chem.* **2003**, 1, 155–166.
- [2] J.J.D. de Jong, L.N. Lucas, R. Hania, A. Pugzlys, R.M. Kellogg, B.L. Feringa, K. Duppen, J.H. van Esch, *Eur. J. Org. Chem.* **2003**, 2003, 1887-1893.
- [3] R. Grisorio, G.P. Suranna, P. Mastrorilli, M. Mazzeo, S. Colella, S. Carallo, G. Gigli, *Dalton Trans.* **2013**, 42, 8939-8950.
- [4] <https://www.rhd-instruments.de/en/products/cells/tsc-1600-closed>
